# Supplementary material for: A novel and efficient synthesis of phenanthrene derivatives via palladium/norbornadiene-catalyzed domino one-pot reaction
Source: publisher site journal article supplement (doi:10.3762/bjoc.15.26), 2019-01-31

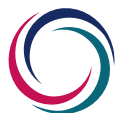

## Supporting Information

for

### **A novel and efficient synthesis of phenanthrene derivatives via palladium/norbornadiene-catalyzed domino one-pot reaction**

Yue Zhong, Wen-Yu Wu, Shao-Peng Yu, Tian-Yuan Fan, Hai-Tao Yu, Nian-Guang Li, Zhi-Hao Shi, Yu-Ping Tang and Jin-Ao Duan

*Beilstein J. Org. Chem.* **2019**, *15*, 291–298. doi:10.3762/bjoc.15.26

### **Spectral data of products, and $^1\text{H}$ NMR and $^{13}\text{C}$ NMR spectra for the products**

## Table of contents

|                                                                           |    |
|---------------------------------------------------------------------------|----|
| 1. Spectral data of products.....                                         | S2 |
| 2. $^1\text{H}$ NMR and $^{13}\text{C}$ NMR spectra for the products..... | S8 |

## 1. Spectral data of products

### 1-Methylphenanthrene (y-1)

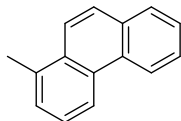

Following the general procedure on a 0.30 mmol scale, compound **y-1** (56.5 mg, 98 %) was obtained as white solid.  $^1\text{H NMR}$  (500 MHz,  $\text{CDCl}_3$ )  $\delta$  8.71 (d,  $J = 8.2$  Hz, 1H), 8.59 (d,  $J = 8.3$  Hz, 1H), 7.96 (d,  $J = 9.1$  Hz, 1H), 7.90 (d,  $J = 8.9$  Hz, 1H), 7.79 (d,  $J = 9.1$  Hz, 1H), 7.68 – 7.62 (m, 1H), 7.61 – 7.57 (m, 1H), 7.57 – 7.52 (m, 1H), 7.45 (d,  $J = 7.1$  Hz, 1H), 2.76 (s, 3H).  $^{13}\text{C NMR}$  (126 MHz,  $\text{CDCl}_3$ )  $\delta$  134.91, 131.70, 130.85, 130.71, 130.39, 128.51, 127.80, 126.72, 126.58, 126.45, 126.18, 122.99, 122.90, 120.90, 19.99. HRMS (ESI) calcd. for  $\text{C}_{15}\text{H}_{12}$   $[\text{M}+\text{H}]^+$ : 193.1017, found 193.1014;  $[\text{M}+\text{Na}]^+$ : 215.0837, found 215.0835.

### Chrysene (y-2)

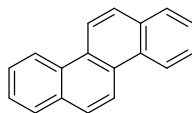

Following the general procedure on a 0.30 mmol scale, compound **y-2** (43.8 mg, 64 %) was obtained as white solid.  $^1\text{H NMR}$  (500 MHz,  $\text{CDCl}_3$ )  $\delta$  8.82 (d,  $J = 8.4$  Hz, 2H), 8.76 (d,  $J = 9.0$  Hz, 2H), 8.04 (t,  $J = 8.2$  Hz, 4H), 7.74 (m,  $J = 8.3, 7.0, 1.3$  Hz, 2H), 7.71 – 7.64 (m, 2H).  $^{13}\text{C NMR}$  (126 MHz,  $\text{CDCl}_3$ )  $\delta$  132.18, 130.56, 128.57, 128.22, 127.35, 126.68, 126.38, 123.16, 121.22. HRMS (ESI) calcd. for  $\text{C}_{18}\text{H}_{12}$   $[\text{M}+\text{H}]^+$ : 229.1017, found 229.1012;  $[\text{M}+\text{Na}]^+$ : 251.0837, found 251.0834.

### 1-Methoxyphenanthrene (y-3)

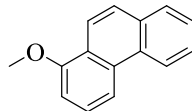

Following the general procedure on a 0.30 mmol scale, compound **y-3** (58.1 mg, 93 %) was obtained as white solid.  $^1\text{H NMR}$  (500 MHz,  $\text{CDCl}_3$ )  $\delta$  8.70 (d,  $J = 8.2$  Hz, 1H), 8.31 (d,  $J = 8.4$  Hz, 1H), 8.26 (d,  $J = 9.1$  Hz, 1H), 7.92 (dd,  $J = 7.9, 1.1$  Hz, 1H), 7.78 (d,  $J = 9.1$  Hz, 1H), 7.68 – 7.58 (m, 3H), 7.04 (d,  $J = 7.8$  Hz, 1H), 4.07 (s, 3H).  $^{13}\text{C NMR}$  (126 MHz,  $\text{CDCl}_3$ )  $\delta$  154.99, 131.27, 130.54, 129.09, 127.56, 125.69, 125.62, 125.43, 125.08, 122.22, 119.39, 114.04, 104.86, 54.76. HRMS (ESI) calcd. for  $\text{C}_{15}\text{H}_{12}\text{O}$   $[\text{M}+\text{H}]^+$ : 209.0966, found 209.0970;  $[\text{M}+\text{Na}]^+$ : 231.0786, found 231.0789.

### 1-Phenylphenanthrene (y-4)

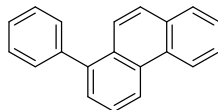

Following the general procedure on a 0.30 mmol scale, compound **y-4** (67.14 mg, 88 %) was obtained as colorless oil. **<sup>1</sup>H NMR** (500 MHz, CDCl<sub>3</sub>) δ 8.78 (dd, *J* = 8.3, 4.6 Hz, 2H), 7.91 (d, *J* = 7.8 Hz, 1H), 7.84 (d, *J* = 9.2 Hz, 1H), 7.75 – 7.69 (m, 3H), 7.66 – 7.62 (m, 1H), 7.58 (dd, *J* = 7.2, 1.0 Hz, 1H), 7.54 (d, *J* = 4.3 Hz, 4H), 7.51 – 7.46 (m, 1H). **<sup>13</sup>C NMR** (126 MHz, CDCl<sub>3</sub>) δ 141.14, 141.04, 131.76, 130.71, 130.44, 130.25, 129.95, 128.49, 128.30, 127.92, 127.27, 126.89, 126.72, 126.68, 125.98, 124.63, 122.99, 122.17. HRMS (ESI) calcd. for C<sub>20</sub>H<sub>14</sub> [M+H]<sup>+</sup>:255.1174, found 255.1178; [M+Na]<sup>+</sup>: 277.0993, found 277.0995.

#### 1-Ethylphenanthrene (**y-5**)

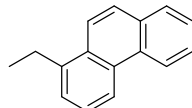

Following the general procedure on a 0.30 mmol scale, compound **y-5** (56.3 mg, 91 %) was obtained as white solid. **<sup>1</sup>H NMR** (500 MHz, CDCl<sub>3</sub>) δ 8.74 (d, *J* = 7.8 Hz, 1H), 8.63 (d, *J* = 8.4 Hz, 1H), 8.05 (d, *J* = 9.2 Hz, 1H), 7.93 (dd, *J* = 7.8, 1.3 Hz, 1H), 7.81 (d, *J* = 9.2 Hz, 1H), 7.75 – 7.56 (m, 3H), 7.51 (d, *J* = 7.1 Hz, 1H), 3.21 (q, *J* = 7.5 Hz, 2H), 1.45 (t, *J* = 7.6 Hz, 3H). **<sup>13</sup>C NMR** (126 MHz, CDCl<sub>3</sub>) δ 141.05, 131.67, 130.91, 130.68, 130.08, 128.46, 126.73, 126.56, 126.46, 126.36, 126.22, 123.01, 122.58, 120.91, 15.54. HRMS (ESI) calcd. for C<sub>16</sub>H<sub>14</sub> [M+H]<sup>+</sup>:207.1174, found 207.1179; [M+Na]<sup>+</sup>: 229.0993, found 229.0999.

#### 1-Isopropylphenanthrene (**y-6**)

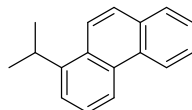

Following the general procedure on a 0.30 mmol scale, compound **y-6** (59.5 mg, 90 %) was obtained as white solid. **<sup>1</sup>H NMR** (500 MHz, CDCl<sub>3</sub>) δ 8.76 (d, *J* = 8.2 Hz, 1H), 8.65 (d, *J* = 8.2 Hz, 1H), 8.14 (d, *J* = 9.3 Hz, 1H), 7.94 (d, *J* = 7.7 Hz, 1H), 7.83 (d, *J* = 9.3 Hz, 1H), 7.71 – 7.60 (m, 4H), 3.88 (m, 1H), 1.49 (d, *J* = 6.8 Hz, 6H). **<sup>13</sup>C NMR** (126 MHz, CDCl<sub>3</sub>) δ 145.27, 131.49, 130.94, 130.64, 129.58, 128.33, 126.64, 126.51, 126.42, 126.34, 123.01, 122.73, 122.08, 120.65, 28.84, 23.75. HRMS (ESI) calcd. for C<sub>17</sub>H<sub>16</sub> [M+H]<sup>+</sup>:221.1330, found 221.1327; [M+Na]<sup>+</sup>: 243.1150, found 243.1148.

#### 1,2-Dimethylphenanthrene (**y-7**)

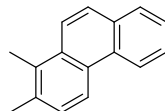

Following the general procedure on a 0.30 mmol scale, compound **y-7** (53.8 mg, 87 %) was obtained as white solid. **<sup>1</sup>H NMR** (500 MHz, CDCl<sub>3</sub>) δ 8.71 (d, *J* = 8.3 Hz, 1H), 8.52 (d, *J* = 8.5 Hz, 1H), 8.06 (d, *J* = 9.2 Hz, 1H), 7.92 (d, *J* = 7.9 Hz, 1H), 7.80 (d, *J* = 9.2 Hz, 1H), 7.67 (m, 1H), 7.62 – 7.58 (m, 1H), 7.51 (d, *J* = 8.5 Hz, 1H), 2.70 (s, 3H), 2.57 (s, 3H). **<sup>13</sup>C NMR** (126 MHz, CDCl<sub>3</sub>) δ 134.39, 132.31, 131.14, 130.94, 130.78, 129.08, 128.73, 128.31, 126.64, 126.44, 126.06, 122.88, 122.69, 120.19, 20.91, 15.04. HRMS (ESI) calcd. for C<sub>16</sub>H<sub>14</sub> [M+H]<sup>+</sup>:207.1174, found 207.1171; [M+Na]<sup>+</sup>: 229.0993, found 229.0989.

### 1-Methyl-4-nitrophenanthrene (y-8)

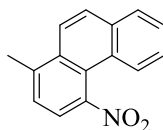

Following the general procedure on a 0.30 mmol scale, compound **y-8** (60.5 mg, 85 %) was obtained as light yellow solid.  $^1\text{H NMR}$  (500 MHz,  $\text{CDCl}_3$ )  $\delta$  9.48 (s, 1H), 8.76 (d,  $J = 8.3$  Hz, 1H), 8.25 (s, 1H), 8.00 – 7.96 (m, 3H), 7.81 – 7.76 (m, 1H), 7.74 – 7.70 (m, 1H), 2.85 (s, 3H).  $^{13}\text{C NMR}$  (126 MHz,  $\text{CDCl}_3$ )  $\delta$  145.33, 137.02, 134.61, 131.90, 130.85, 130.80, 130.00, 128.89, 127.87, 127.81, 123.15, 122.05, 121.00, 117.23, 20.17. HRMS (ESI) calcd. for  $\text{C}_{15}\text{H}_{11}\text{NO}_2$   $[\text{M}+\text{H}]^+$ : 238.0868, found 238.0872;  $[\text{M}+\text{Na}]^+$ : 260.0687, found 260.0683.

### 1-Nitrophenanthrene (y-9)

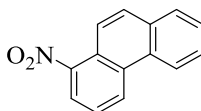

Following the general procedure on a 0.30 mmol scale, compound **y-9** (50.2 mg, 75 %) was obtained as light yellow solid.  $^1\text{H NMR}$  (500 MHz,  $\text{CDCl}_3$ )  $\delta$  8.99 (d,  $J = 8.4$  Hz, 1H), 8.71 (d,  $J = 8.2$  Hz, 1H), 8.32 (d,  $J = 9.3$  Hz, 1H), 8.21 (d,  $J = 8.7$  Hz, 1H), 7.98 (d,  $J = 9.1$  Hz, 2H), 7.79 – 7.70 (m, 3H).  $^{13}\text{C NMR}$  (126 MHz,  $\text{CDCl}_3$ )  $\delta$  147.87, 131.77, 131.59, 130.63, 129.24, 128.82, 127.96, 127.93, 127.78, 125.12, 124.18, 123.24, 122.92, 120.12. HRMS (ESI) calcd. for  $\text{C}_{14}\text{H}_9\text{NO}_2$   $[\text{M}+\text{H}]^+$ : 224.0712, found 224.0716;  $[\text{M}+\text{Na}]^+$ : 246.0531, found 246.0537.

### 1-(Trifluoromethyl)phenanthrene (y-10)

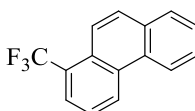

Following the general procedure on a 0.30 mmol scale, compound **y-10** (70.2 mg, 95 %) was obtained as white solid.  $^1\text{H NMR}$  (500 MHz,  $\text{CDCl}_3$ )  $\delta$  8.92 (d,  $J = 8.4$  Hz, 1H), 8.71 (d,  $J = 8.2$  Hz, 1H), 8.14 (dd,  $J = 9.3, 1.9$  Hz, 1H), 8.00 (d,  $J = 7.4$  Hz, 1H), 7.96 (d,  $J = 9.0$  Hz, 1H), 7.91 (d,  $J = 9.3$  Hz, 1H), 7.76 – 7.67 (m, 3H).  $^{13}\text{C NMR}$  (126 MHz,  $\text{CDCl}_3$ )  $\delta$  130.49, 130.21, 128.88, 127.84, 127.61, 127.29, 126.33, 126.21, 125.84, 125.56, 125.20, 124.05, 123.79, 121.75, 121.04. HRMS (ESI) calcd. for  $\text{C}_{15}\text{H}_9\text{F}_3$   $[\text{M}+\text{H}]^+$ : 247.0735, found 247.0739;  $[\text{M}+\text{Na}]^+$ : 269.0554, found 269.0558.

### 1-Fluorophenanthrene (y-11)

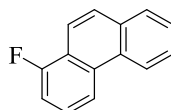

Following the general procedure on a 0.30 mmol scale, compound **y-11** (51.2 mg, 87 %) was obtained as white solid.  $^1\text{H NMR}$  (500 MHz,  $\text{CDCl}_3$ )  $\delta$  8.69 (d,  $J = 8.2$  Hz, 1H), 8.49 (d,  $J = 8.4$  Hz, 1H), 8.07 (d,  $J = 9.1$  Hz, 1H), 7.95 (d,  $J = 7.6$  Hz, 1H), 7.83 (d,  $J = 9.0$  Hz, 1H), 7.73 – 7.69 (m, 1H), 7.68 – 7.65 (m, 1H), 7.61 (m, 1H), 7.32 (dd,  $J = 9.8, 7.6$  Hz, 1H).  $^{13}\text{C NMR}$  (126 MHz,  $\text{CDCl}_3$ )  $\delta$  160.23, 158.24, 132.12,

132.08, 132.02, 129.59, 129.57, 128.73, 127.34, 127.32, 127.06, 126.95, 126.46, 126.39, 122.96, 121.57, 121.45, 118.49, 118.43, 118.36, 118.33, 111.04, 110.88. HRMS (ESI) calcd. for  $C_{14}H_9F$   $[M+H]^+$ : 197.0767, found 197.0773;  $[M+Na]^+$ : 219.0586, found 219.0589.

### 1-Chlorophenanthrene (y-12)

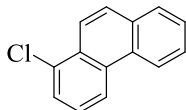

Following the general procedure on a 0.30 mmol scale, compound **y-12** (54.9 mg, 86 %) was obtained as white solid.  $^1H$  NMR (500 MHz,  $CDCl_3$ )  $\delta$  8.71 (d,  $J$  = 8.2 Hz, 1H), 8.66 (d,  $J$  = 8.4 Hz, 1H), 8.27 (d,  $J$  = 9.2 Hz, 1H), 7.96 (d,  $J$  = 7.7 Hz, 1H), 7.89 (d,  $J$  = 9.2 Hz, 1H), 7.72 (m, 2H), 7.69 – 7.65 (m, 1H), 7.61 – 7.57 (m, 1H).  $^{13}C$  NMR (126 MHz,  $CDCl_3$ )  $\delta$  132.70, 131.89, 131.88, 129.93, 129.32, 128.70, 128.21, 127.18, 127.07, 127.06, 126.43, 122.95, 122.50, 121.62. HRMS (ESI) calcd. for  $C_{14}H_9Cl$   $[M+H]^+$ : 213.0471, found 213.0475;  $[M+Na]^+$ : 235.0290, found 235.0297.

### 1-Phenanthrenecarboxylic acid, methyl ester (y-13)

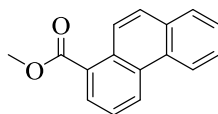

Following the general procedure on a 0.30 mmol scale, compound **y-13** (66.6 mg, 94 %) was obtained as light yellow oil.  $^1H$  NMR (500 MHz,  $CDCl_3$ )  $\delta$  8.93 (d,  $J$  = 8.4 Hz, 1H), 8.81 (d,  $J$  = 9.3 Hz, 1H), 8.71 (d,  $J$  = 8.2 Hz, 1H), 8.24 (dd,  $J$  = 7.4, 1.0 Hz, 1H), 7.97 – 7.93 (m, 1H), 7.90 (d,  $J$  = 9.3 Hz, 1H), 7.73 – 7.64 (m, 3H), 4.06 (s, 3H).  $^{13}C$  NMR (126 MHz,  $CDCl_3$ )  $\delta$  168.42, 131.61, 130.93, 130.63, 130.03, 129.81, 128.76, 128.53, 128.22, 127.10, 127.07, 126.90, 125.28, 123.74, 122.78, 52.30. HRMS (ESI) calcd. for  $C_{16}H_{12}O_2$   $[M+H]^+$ : 237.0916, found 237.0912;  $[M+Na]^+$ : 259.0735, found 259.0731.

### 1,3-Dimethylphenanthrene (y-14)

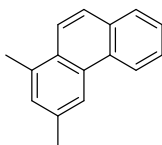

Following the general procedure on a 0.30 mmol scale, compound **y-14** (58.8 mg, 95 %) was obtained as white solid.  $^1H$  NMR (500 MHz,  $CDCl_3$ )  $\delta$  8.74 (d,  $J$  = 8.2 Hz, 1H), 8.43 (s, 1H), 7.94 (dd,  $J$  = 15.2, 8.0 Hz, 2H), 7.77 (d,  $J$  = 9.1 Hz, 1H), 7.68 (m, 1H), 7.65 – 7.60 (m, 1H), 7.34 (s, 1H), 2.77 (s, 3H), 2.63 (s, 3H).  $^{13}C$  NMR (126 MHz,  $CDCl_3$ )  $\delta$  135.73, 134.66, 131.84, 130.48, 130.38, 129.62, 128.75, 128.43, 126.30, 126.27, 125.72, 122.93, 122.77, 120.56, 22.06, 19.84. HRMS (ESI) calcd. for  $C_{16}H_{14}$   $[M+H]^+$ : 207.1174, found 207.1179;  $[M+Na]^+$ : 229.0993, found 229.0997.

### 3-Fluoro-1-methylphenanthrene (**y-15**)

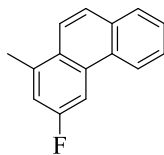

Following the general procedure on a 0.30 mmol scale, compound **y-15** (60.6 mg, 95 %) was obtained as white solid.  $^1\text{H NMR}$  (500 MHz,  $\text{CDCl}_3$ )  $\delta$  8.58 (d,  $J = 8.1$  Hz, 1H), 8.21 (dd,  $J = 11.0, 2.2$  Hz, 1H), 7.96 – 7.90 (m, 2H), 7.76 (d,  $J = 9.1$  Hz, 1H), 7.70 – 7.63 (m, 2H), 7.25 (d,  $J = 9.1$  Hz, 1H), 2.78 (s, 3H).  $^{13}\text{C NMR}$  (126 MHz,  $\text{CDCl}_3$ )  $\delta$  161.26, 158.83, 136.89, 136.80, 131.01, 130.94, 129.15, 129.10, 127.51, 126.54, 125.97, 125.55, 124.82, 124.79, 122.10, 121.39, 115.78, 115.54, 104.72, 104.51, 18.93. HRMS (ESI) calcd. for  $\text{C}_{15}\text{H}_{11}\text{F}$   $[\text{M}+\text{H}]^+$ : 211.0923, found 211.0918;  $[\text{M}+\text{Na}]^+$ : 233.0742, found 233.0739.

### 7-Methoxy-1-methylphenanthrene (**z-1**)

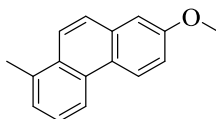

Following the general procedure on a 0.30 mmol scale, compound **z-1** (62.7 mg, 94 %) was obtained as white solid.  $^1\text{H NMR}$  (500 MHz,  $\text{CDCl}_3$ )  $\delta$  8.63 (d,  $J = 8.9$  Hz, 1H), 8.51 (d,  $J = 8.4$  Hz, 1H), 7.98 (d,  $J = 9.1$  Hz, 1H), 7.75 (d,  $J = 9.1$  Hz, 1H), 7.58 – 7.52 (m, 1H), 7.42 (d,  $J = 7.1$  Hz, 1H), 7.31 (m, 2H), 4.00 (s, 3H), 2.78 (s, 3H).  $^{13}\text{C NMR}$  (126 MHz,  $\text{CDCl}_3$ )  $\delta$  158.20, 134.88, 133.07, 130.52, 129.82, 126.81, 126.25, 126.22, 125.07, 124.61, 123.49, 120.41, 117.20, 108.34, 55.41, 19.92. HRMS (ESI) calcd. for  $\text{C}_{16}\text{H}_{14}\text{O}$   $[\text{M}+\text{H}]^+$ : 223.1123, found 223.1128;  $[\text{M}+\text{Na}]^+$ : 245.0942, found 245.0948.

### 1,7-Dimethylphenanthrene (**z-2**)

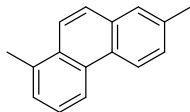

Following the general procedure on a 0.30 mmol scale, compound **z-2** (56.3 mg, 91 %) was obtained as white solid.  $^1\text{H NMR}$  (500 MHz,  $\text{CDCl}_3$ )  $\delta$  8.62 (d,  $J = 8.5$  Hz, 1H), 8.58 (d,  $J = 8.3$  Hz, 1H), 7.96 (d,  $J = 9.1$  Hz, 1H), 7.75 (d,  $J = 9.1$  Hz, 1H), 7.71 (s, 1H), 7.58 – 7.54 (m, 1H), 7.51 (dd,  $J = 8.5, 1.7$  Hz, 1H), 7.45 (d,  $J = 7.0$  Hz, 1H), 2.79 (s, 3H), 2.60 (s, 3H).  $^{13}\text{C NMR}$  (126 MHz,  $\text{CDCl}_3$ )  $\delta$  136.12, 134.81, 131.80, 130.45, 130.36, 128.51, 128.35, 127.98, 127.31, 126.42, 126.05, 122.85, 120.66, 21.45, 19.95. HRMS (ESI) calcd. for  $\text{C}_{16}\text{H}_{14}$   $[\text{M}+\text{H}]^+$ : 207.1174, found 207.1179;  $[\text{M}+\text{Na}]^+$ : 229.0993, found 229.0999.

### 1-Methyl-7-(trifluoromethyl)phenanthrene (**z-3**)

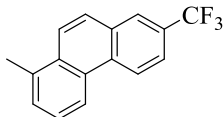

Following the general procedure on a 0.30 mmol scale, compound **z-3** (64.0 mg, 82 %) was obtained as white solid.  $^1\text{H NMR}$  (500 MHz,  $\text{CDCl}_3$ )  $\delta$  8.82 (d,  $J = 8.7$  Hz, 1H), 8.62 (d,  $J = 8.3$  Hz, 1H), 8.21 (s,

1H), 8.09 (d,  $J = 9.1$  Hz, 1H), 7.86 (dd,  $J = 9.0, 2.9$  Hz, 2H), 7.66 – 7.60 (m, 1H), 7.55 (d,  $J = 7.1$  Hz, 1H), 2.81 (s, 3H).  $^{13}\text{C}$  NMR (126 MHz,  $\text{CDCl}_3$ )  $\delta$  135.22, 132.67, 131.51, 130.92, 129.69, 128.86, 126.76, 126.45, 125.82, 125.78, 124.37, 123.90, 122.36, 122.33, 121.23, 19.94. HRMS (ESI) calcd. for  $\text{C}_{16}\text{H}_{11}\text{F}_3[\text{M}+\text{H}]^+$ : 261.0891, found 261.0886;  $[\text{M}+\text{Na}]^+$ : 283.0711, found 283.0708.

#### 7-Fluoro-1-methylphenanthrene (z-4)

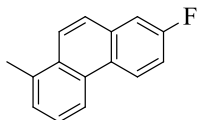

Following the general procedure on a 0.30 mmol scale, compound **z-4** (53.6 mg, 85 %) was obtained as white solid.  $^1\text{H}$  NMR (500 MHz,  $\text{CDCl}_3$ )  $\delta$  8.69 (dd,  $J = 9.1, 5.4$  Hz, 1H), 8.53 (d,  $J = 8.4$  Hz, 1H), 8.01 (d,  $J = 9.1$  Hz, 1H), 7.74 (d,  $J = 9.1$  Hz, 1H), 7.62 – 7.53 (m, 2H), 7.48 (d,  $J = 7.1$  Hz, 1H), 7.42 (m, 1H), 2.79 (s, 3H).  $^{13}\text{C}$  NMR (126 MHz,  $\text{CDCl}_3$ )  $\delta$  162.21, 160.25, 135.08, 133.05, 132.98, 130.30, 130.29, 130.18, 127.61, 127.29, 127.27, 126.58, 125.91, 125.88, 125.38, 125.31, 124.20, 120.67, 115.61, 115.42, 112.43, 112.27, 19.95. HRMS (ESI) calcd. for  $\text{C}_{15}\text{H}_{11}\text{F}[\text{M}+\text{H}]^+$ : 211.0923, found 211.0928;  $[\text{M}+\text{Na}]^+$ : 233.0742, found 233.0749.

#### 7-Chloro-1-methylphenanthrene (z-5)

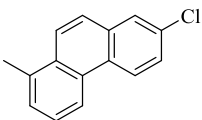

Following the general procedure on a 0.30 mmol scale, compound **z-5** (59.2 mg, 87 %) was obtained as white solid.  $^1\text{H}$  NMR (500 MHz,  $\text{CDCl}_3$ )  $\delta$  8.63 (d,  $J = 8.9$  Hz, 1H), 8.53 (d,  $J = 8.4$  Hz, 1H), 8.00 (d,  $J = 9.1$  Hz, 1H), 7.89 (d,  $J = 2.2$  Hz, 1H), 7.72 – 7.69 (m, 1H), 7.63 – 7.57 (m, 2H), 7.49 (d,  $J = 7.1$  Hz, 1H), 2.78 (s, 3H).  $^{13}\text{C}$  NMR (126 MHz,  $\text{CDCl}_3$ )  $\delta$  135.10, 132.68, 132.20, 130.67, 129.97, 128.99, 128.05, 127.34, 126.99, 126.60, 125.59, 124.67, 124.19, 120.76, 19.93. HRMS (ESI) calcd. for  $\text{C}_{15}\text{H}_{11}\text{Cl}[\text{M}+\text{H}]^+$ : 227.0628, found 227.0623;  $[\text{M}+\text{Na}]^+$ : 249.0447, found 249.0443.

#### 6,7-Dimethoxy-1-methylphenanthrene (z-6)

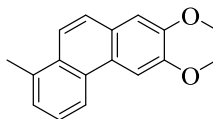

Following the general procedure on a 0.30 mmol scale, compound **z-6** (71.9 mg, 95 %) was obtained as white solid.  $^1\text{H}$  NMR (500 MHz,  $\text{CDCl}_3$ )  $\delta$  8.44 (d,  $J = 8.4$  Hz, 1H), 8.03 (s, 1H), 7.87 (d,  $J = 9.0$  Hz, 1H), 7.70 (d,  $J = 9.0$  Hz, 1H), 7.58 – 7.48 (m, 1H), 7.40 (d,  $J = 7.0$  Hz, 1H), 7.25 (s, 1H), 4.12 (s, 3H), 4.06 (s, 3H), 2.76 (s, 3H).  $^{13}\text{C}$  NMR (126 MHz,  $\text{CDCl}_3$ )  $\delta$  149.32, 149.25, 134.96, 130.14, 129.74, 126.83, 126.74, 125.76, 125.73, 125.26, 121.19, 120.41, 108.09, 103.63, 55.99, 55.91, 20.01. HRMS (ESI) calcd. for  $\text{C}_{17}\text{H}_{16}\text{O}_2[\text{M}+\text{H}]^+$ : 253.1229, found 253.1224;  $[\text{M}+\text{Na}]^+$ : 275.1048, found 275.1043.



## 2. $^1\text{H}$ NMR and $^{13}\text{C}$ NMR spectra for the products

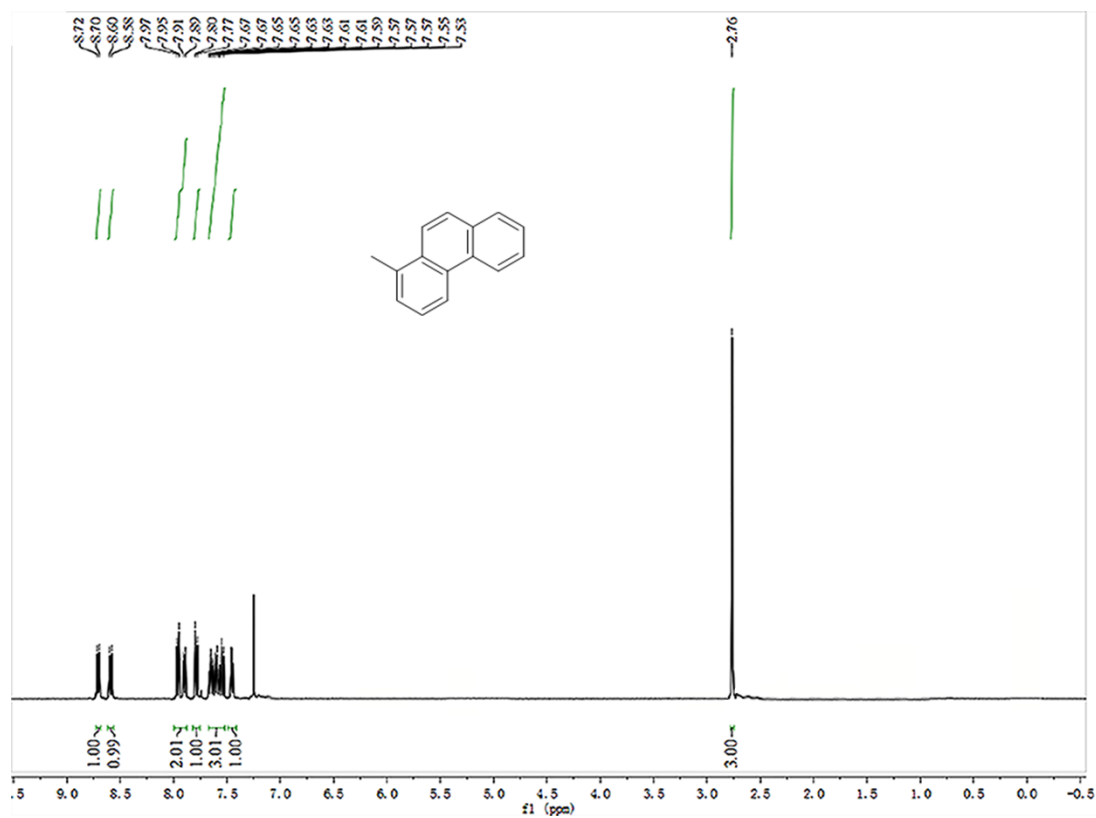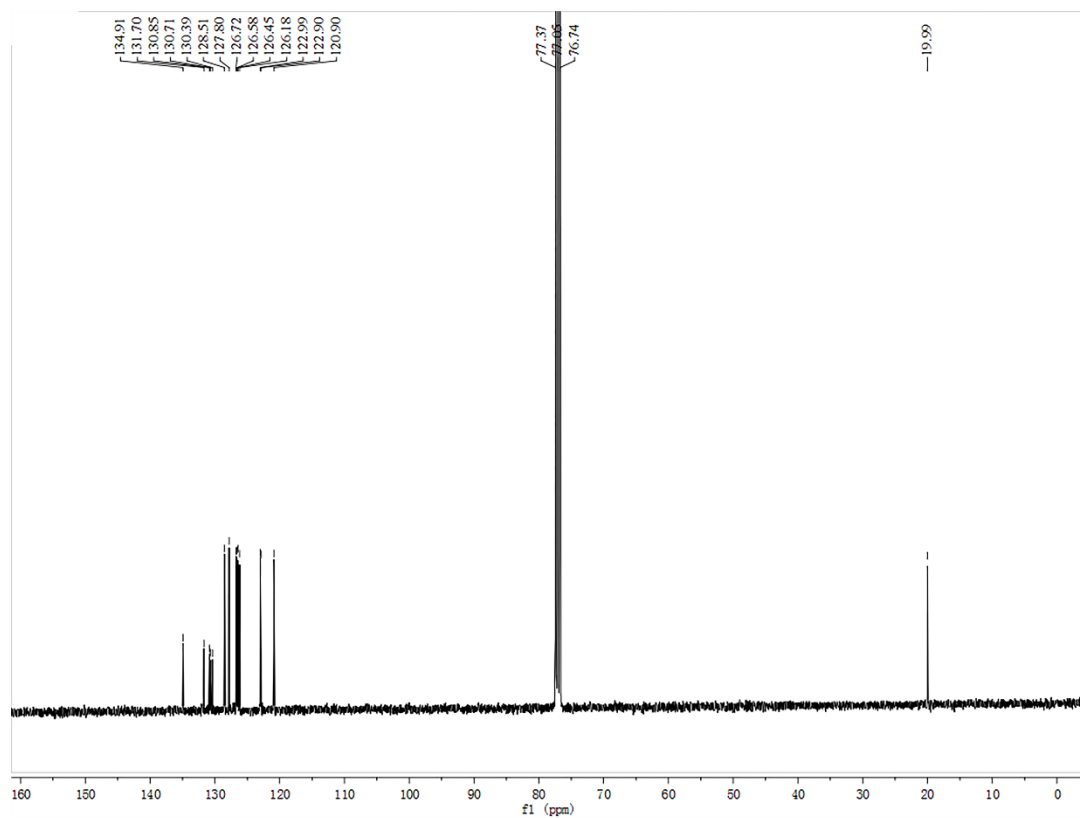

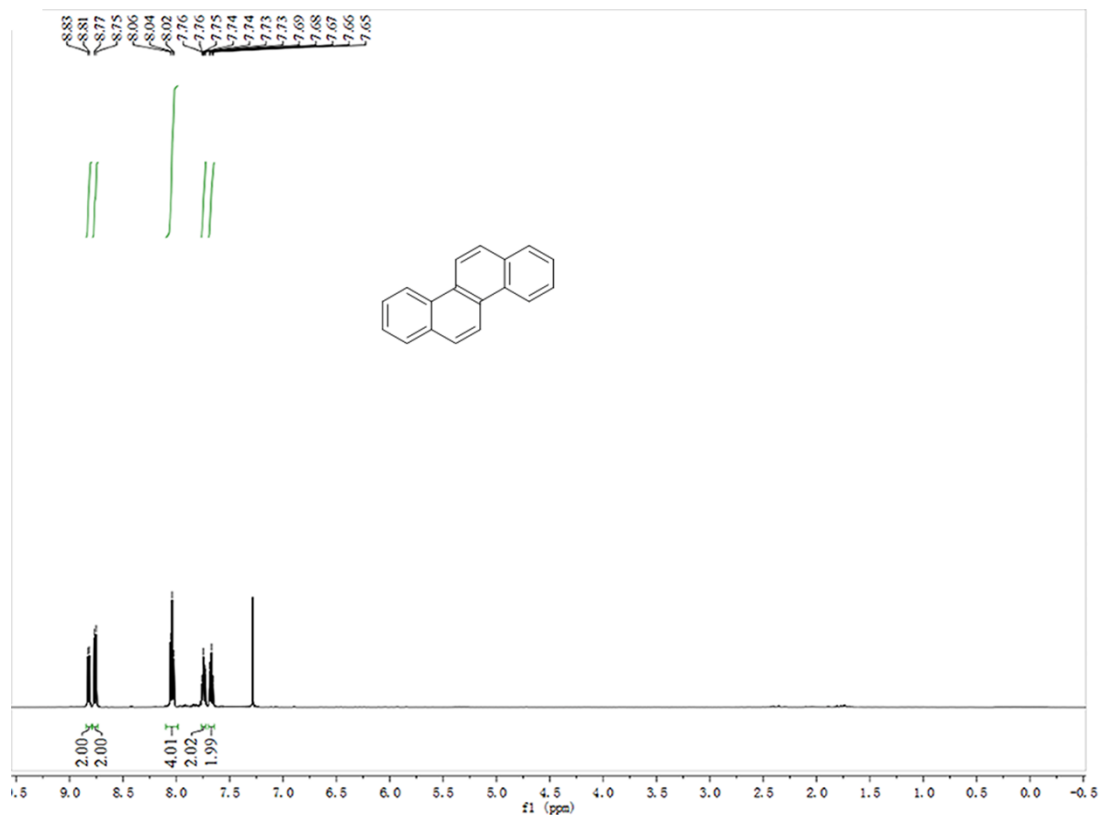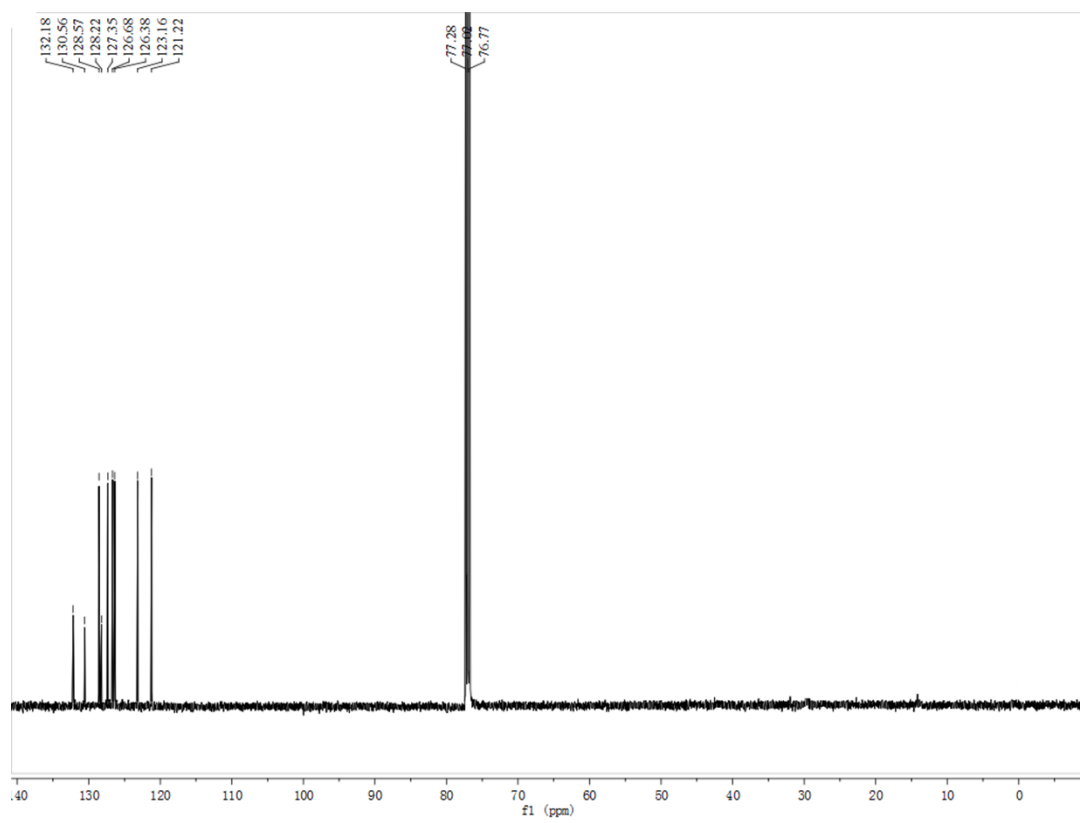

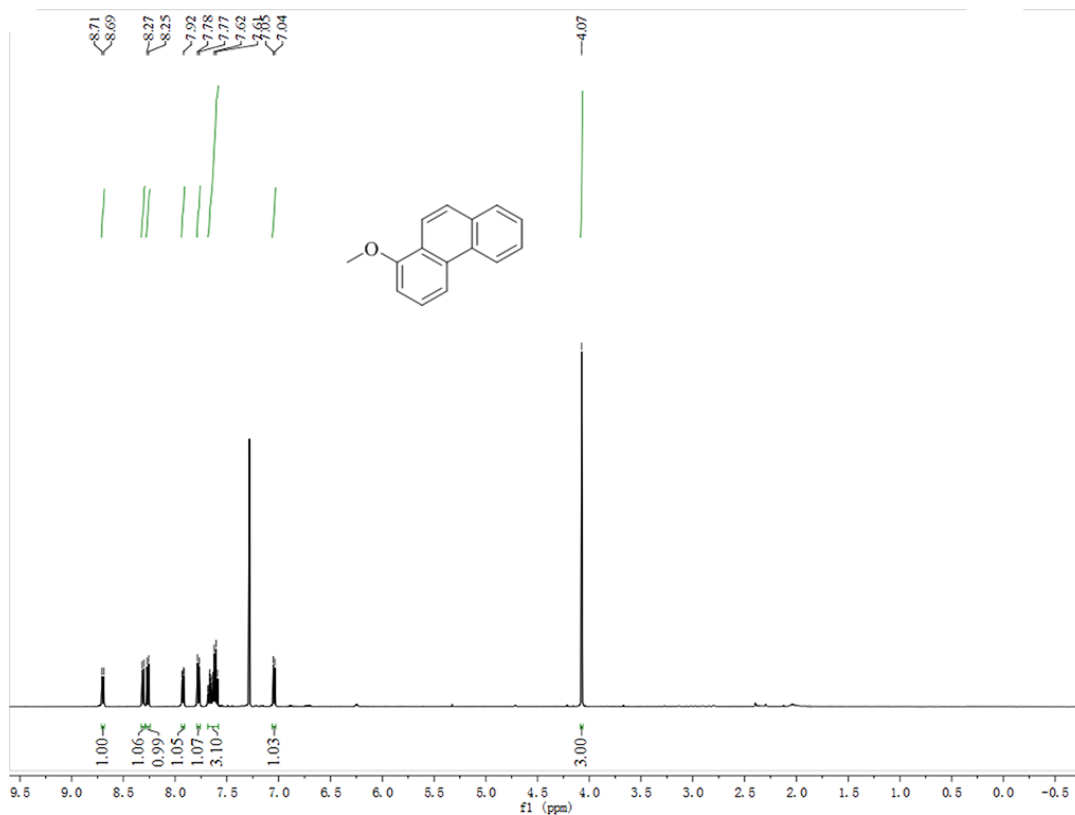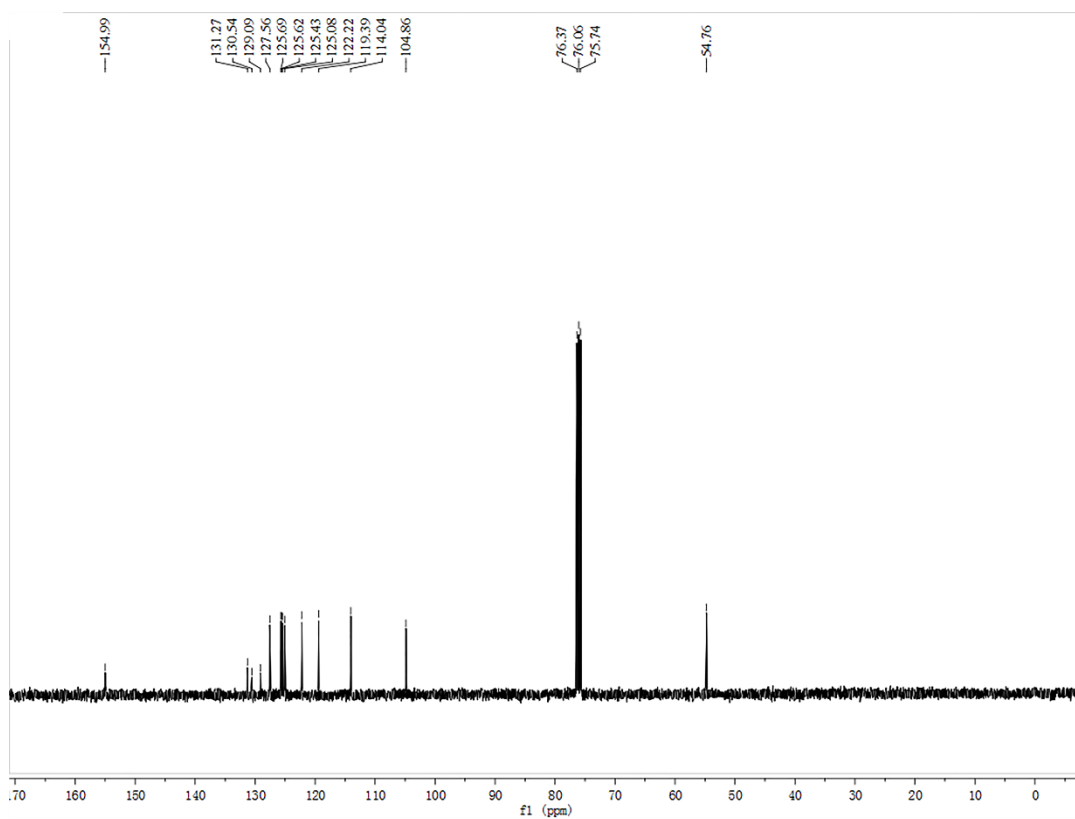

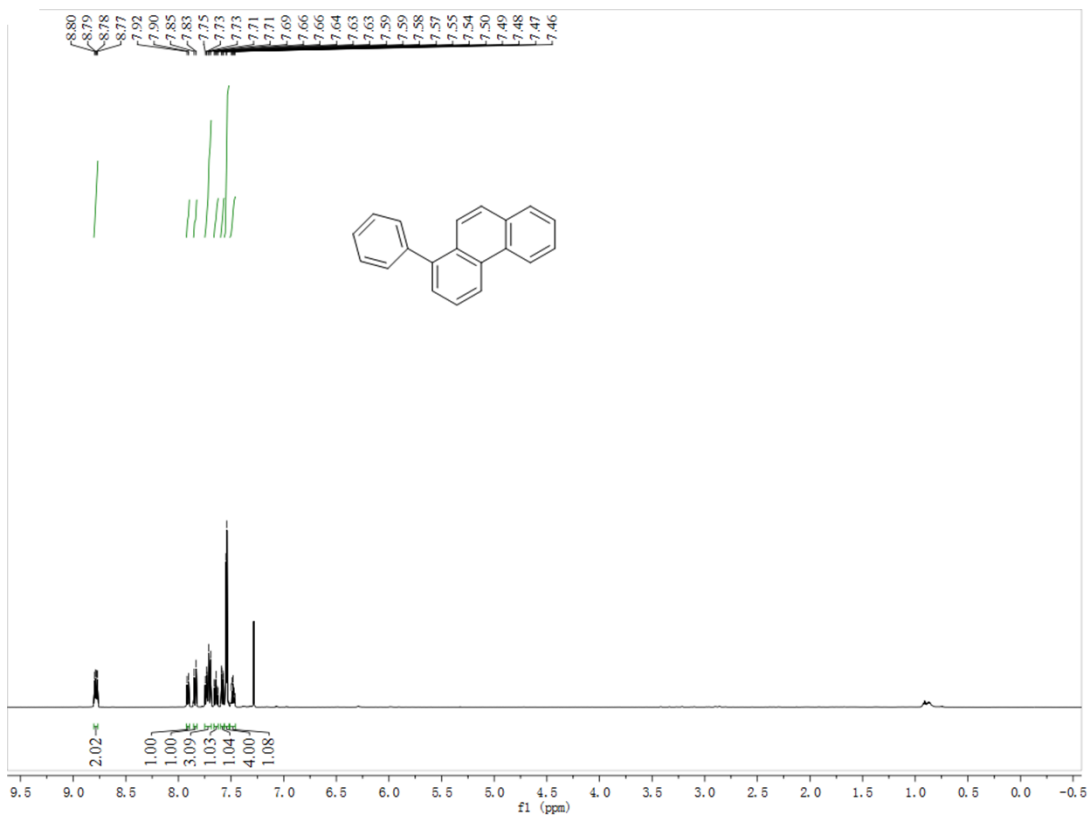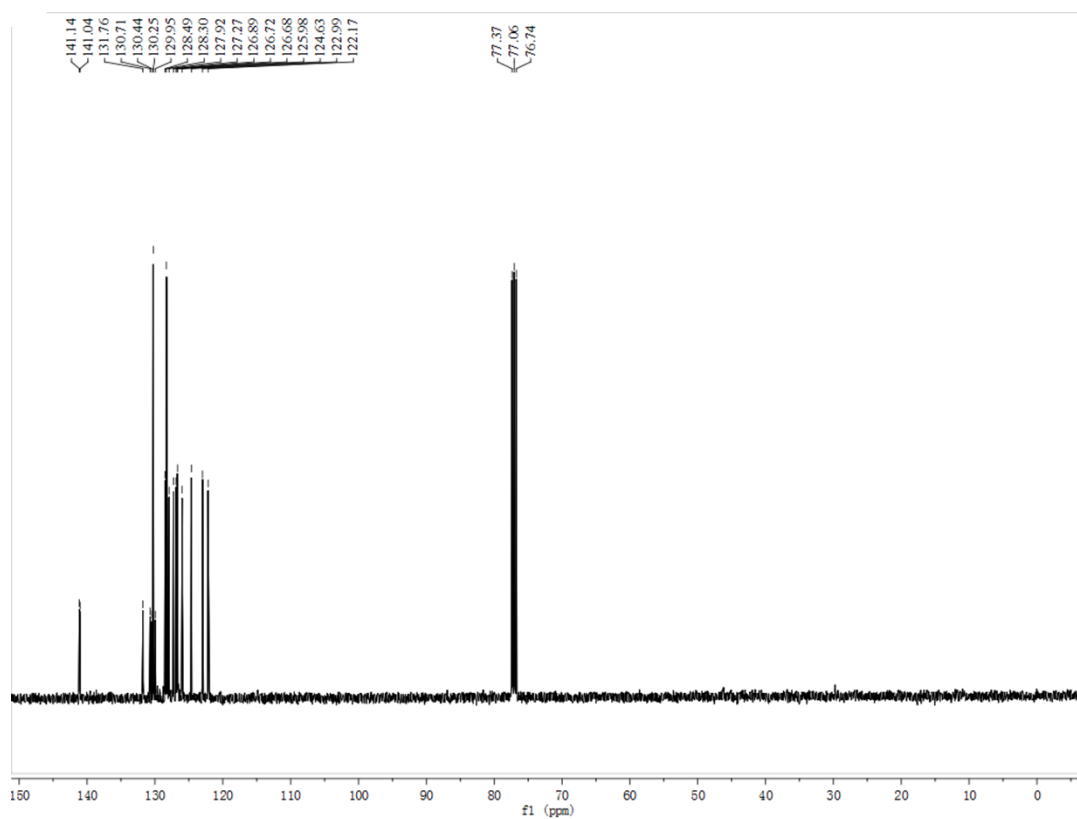

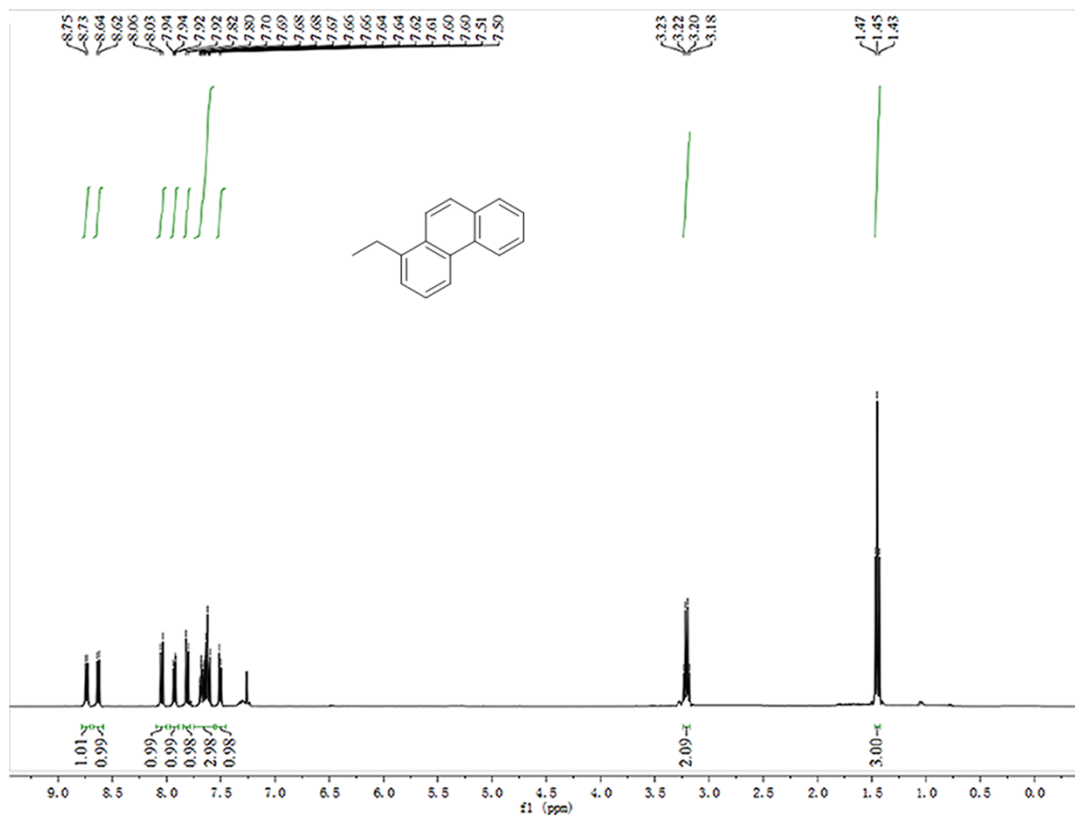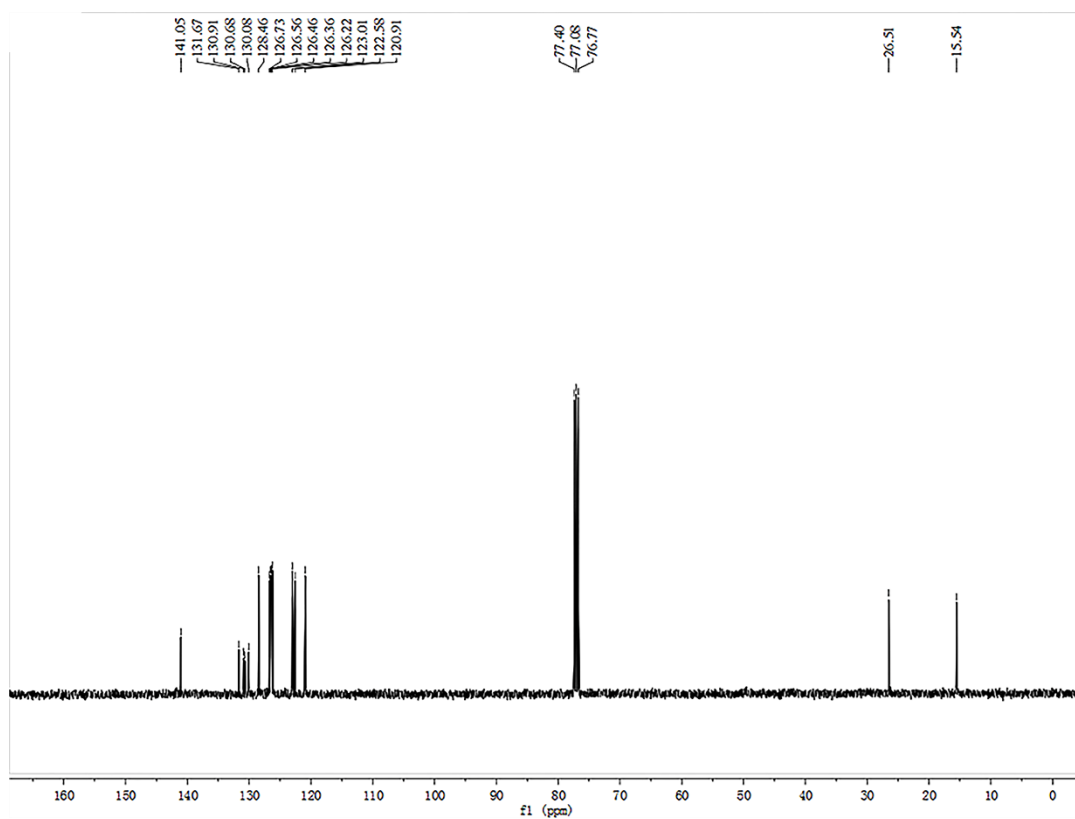

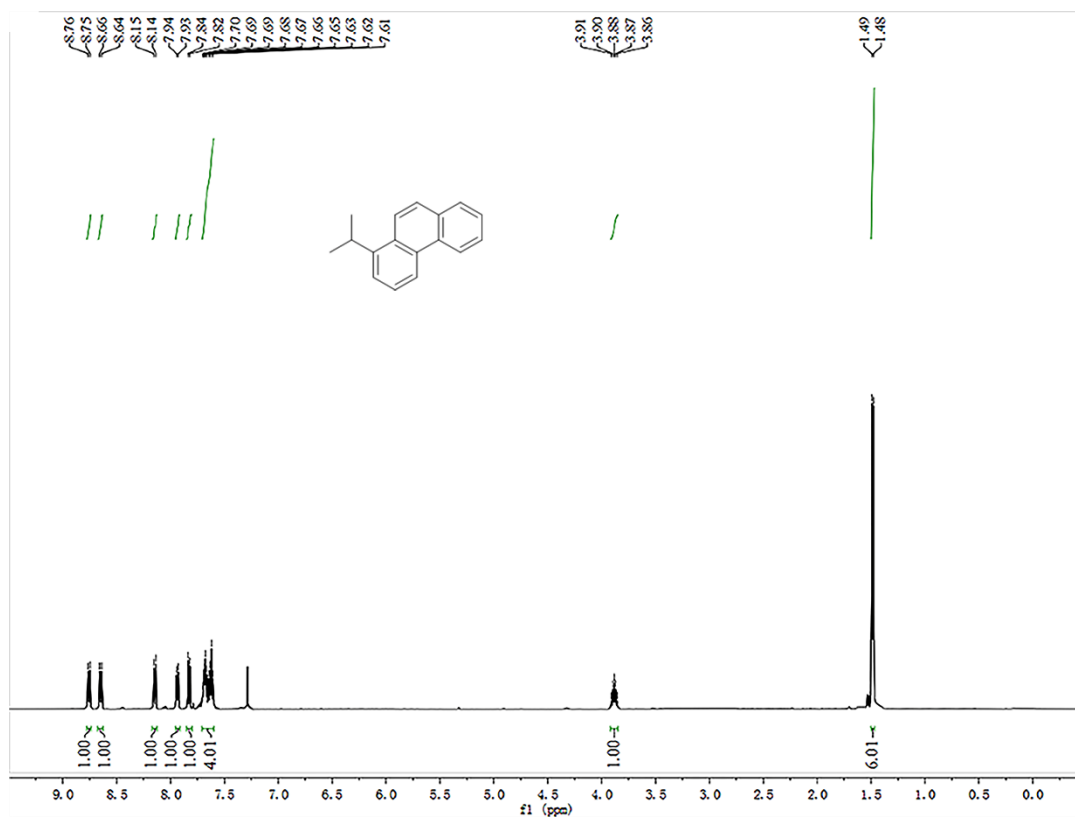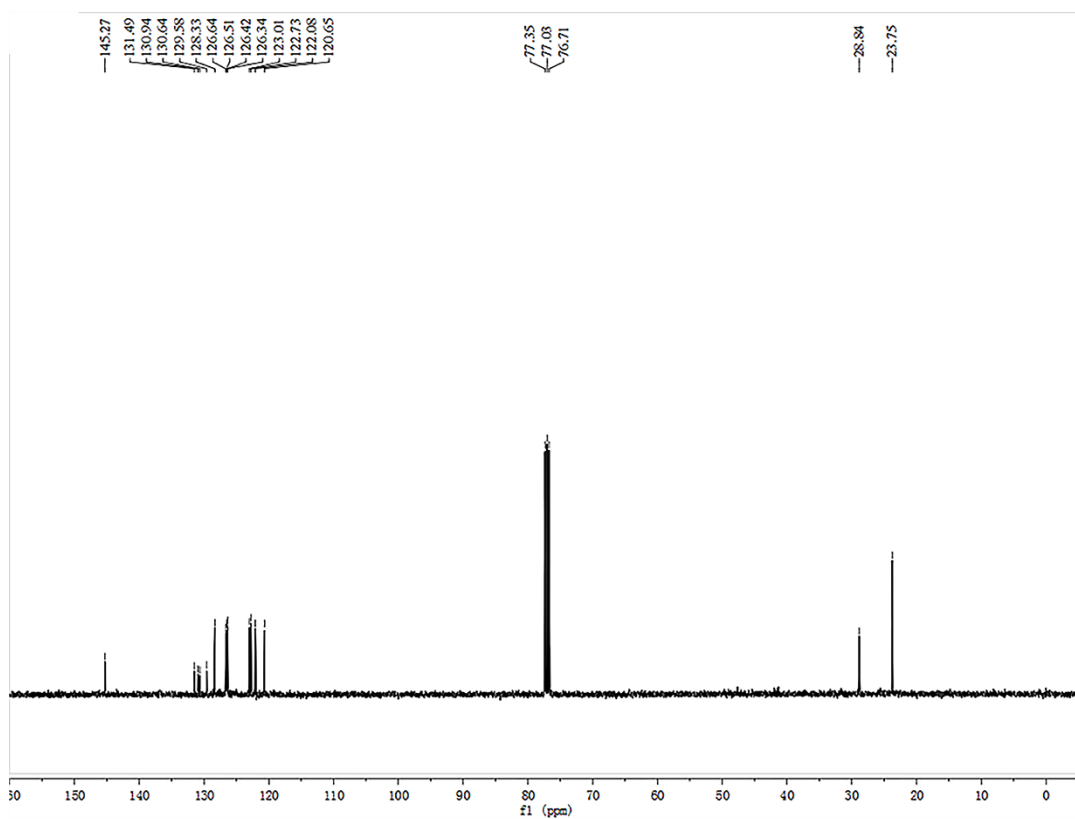

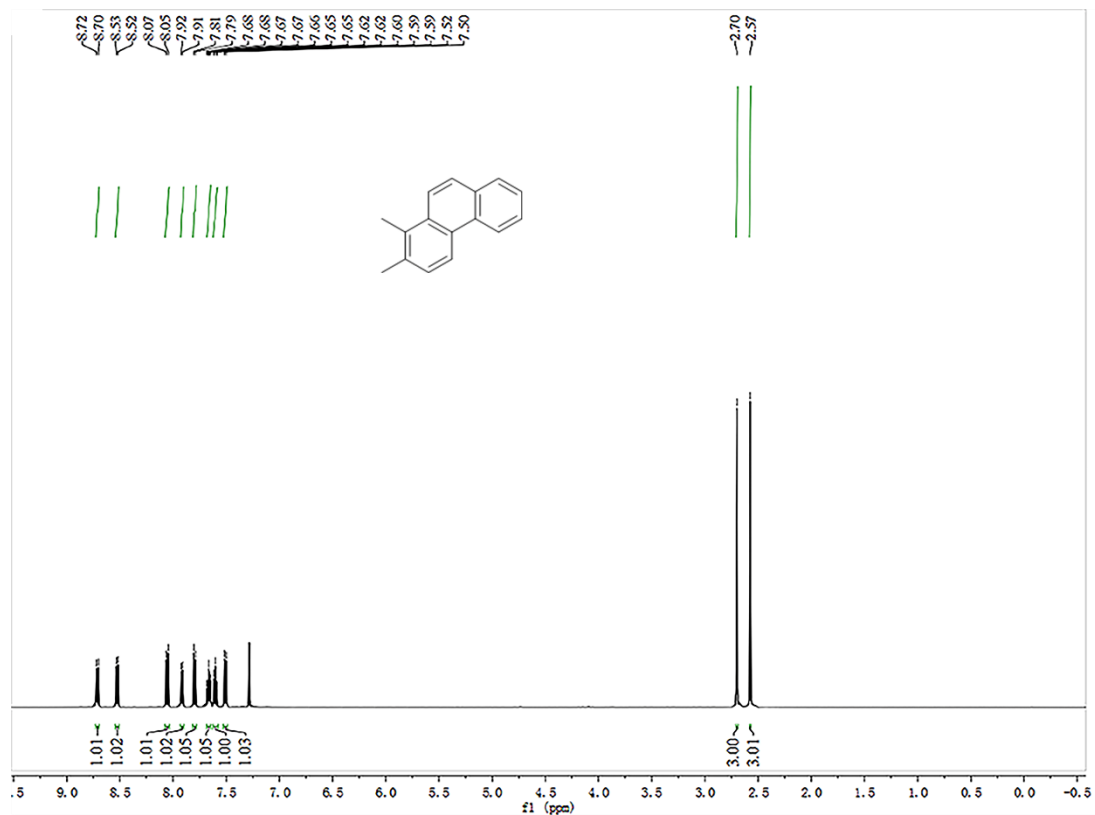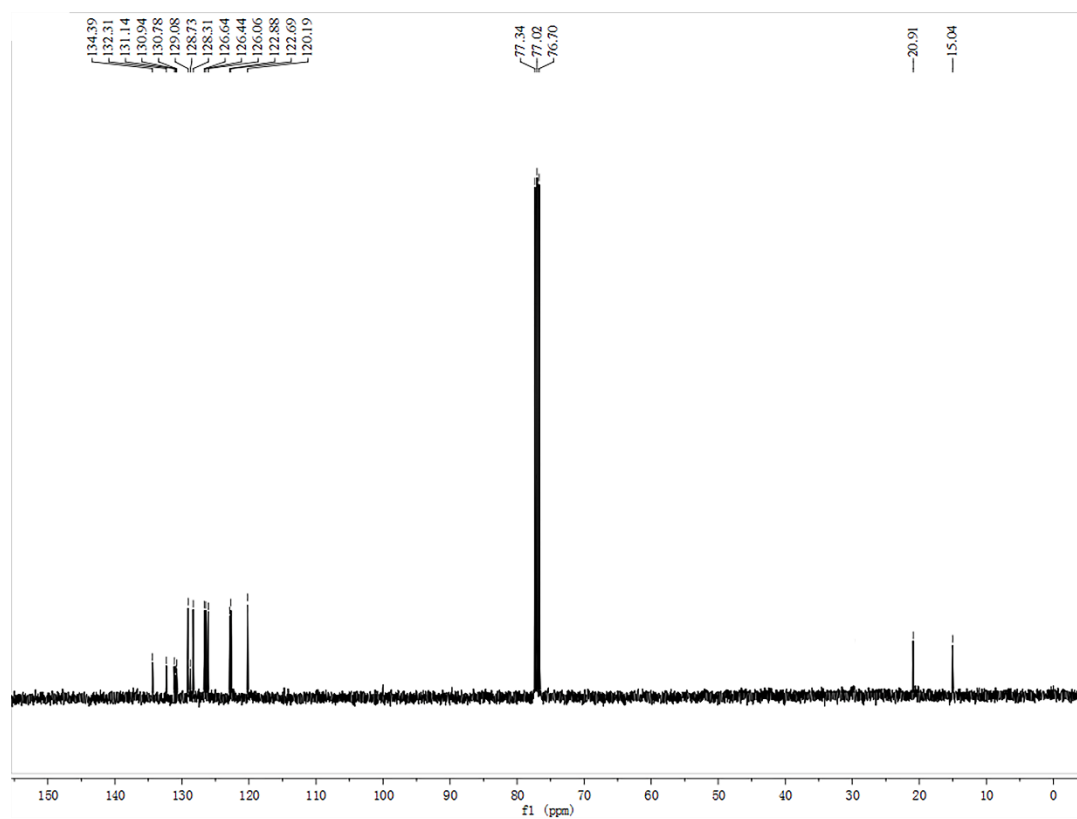

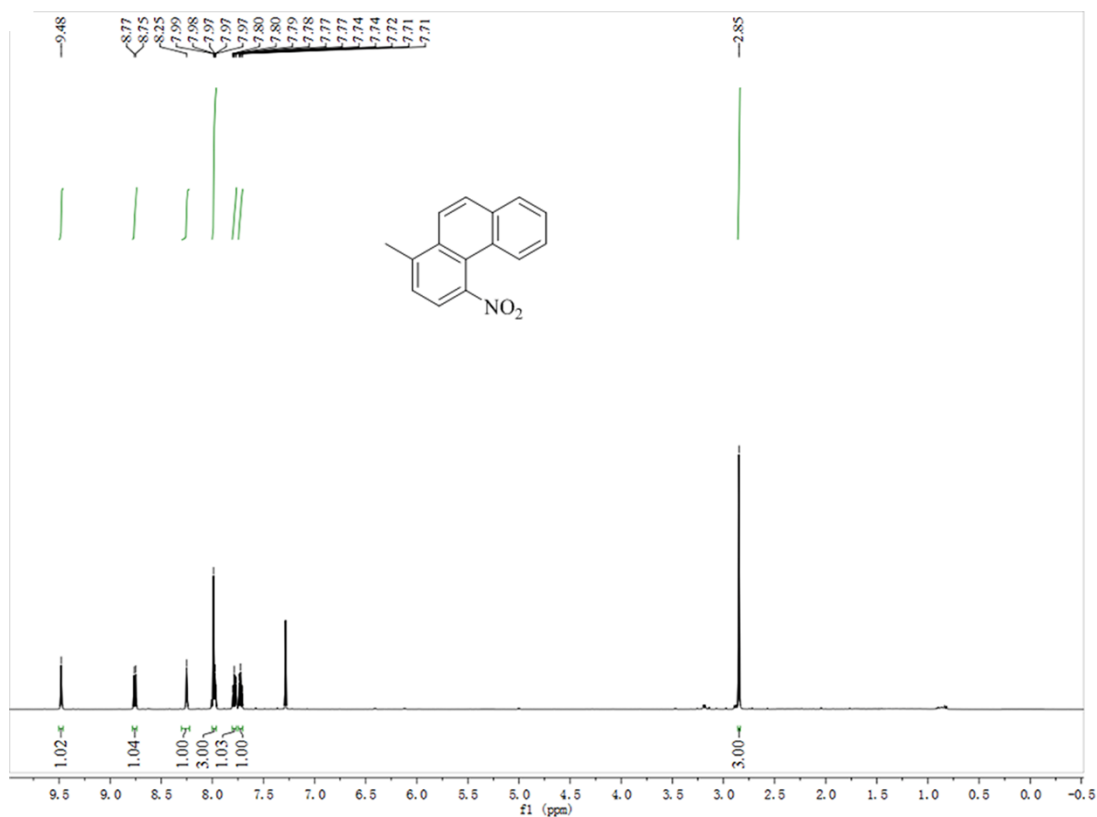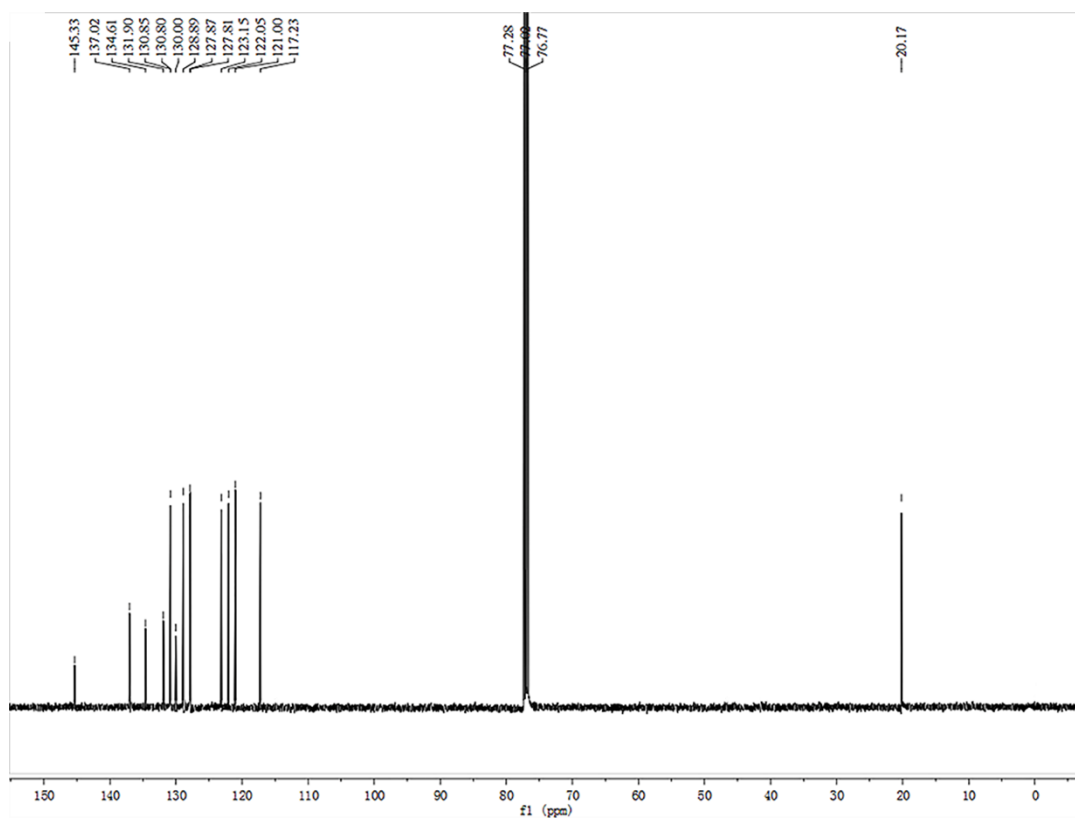



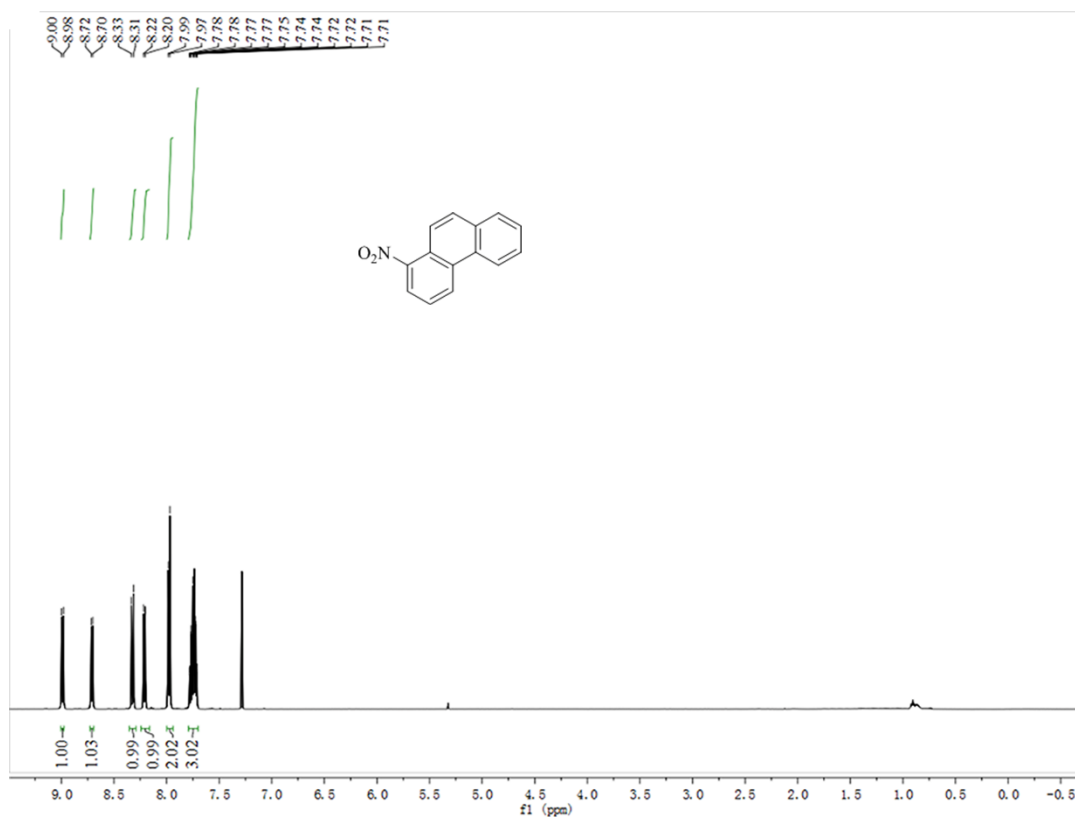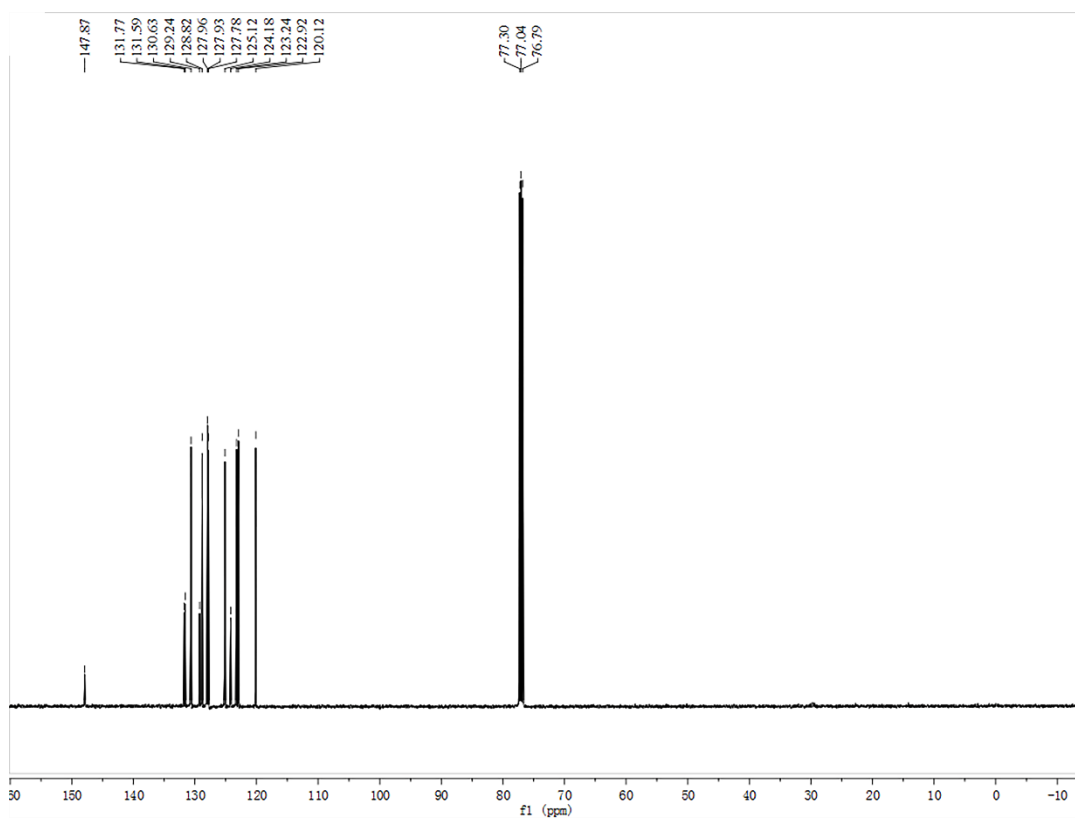

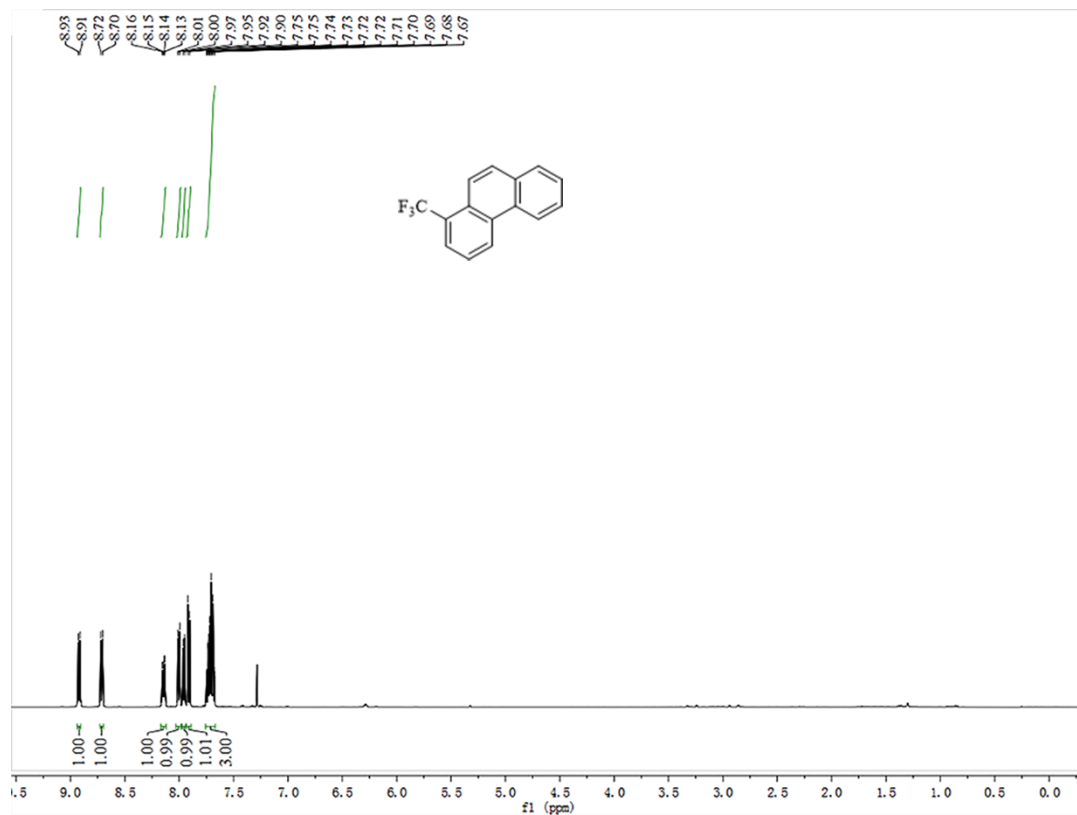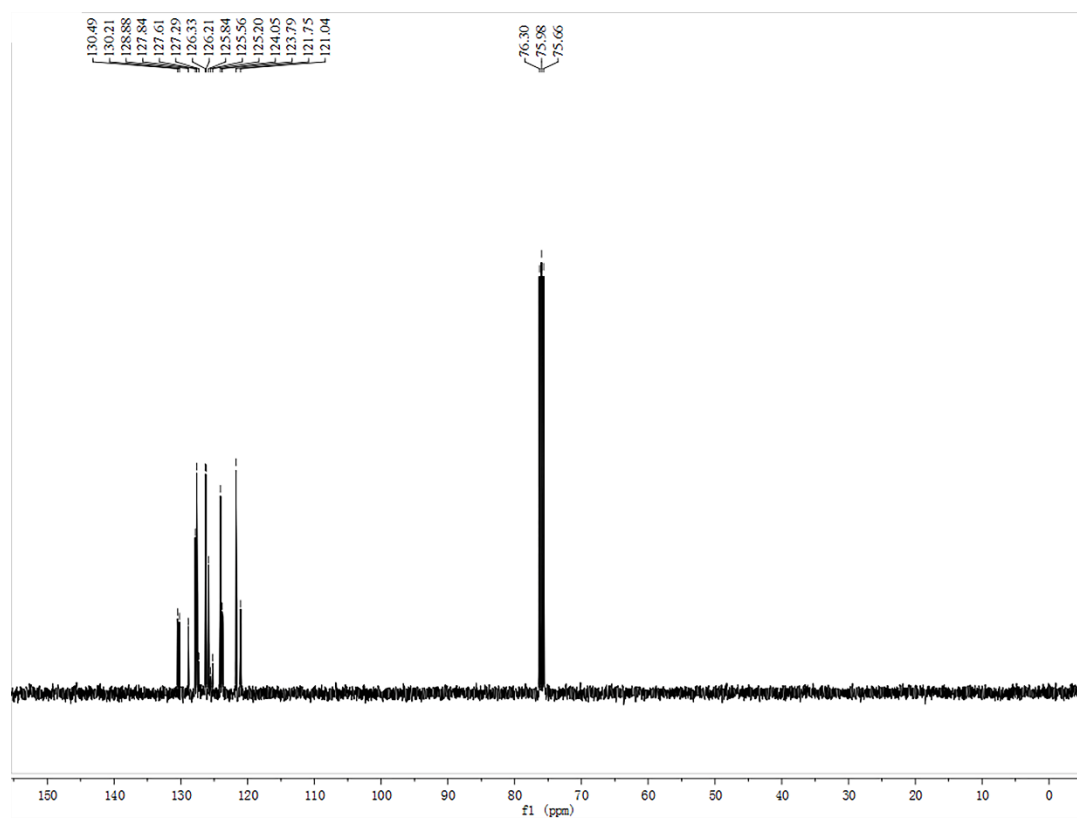

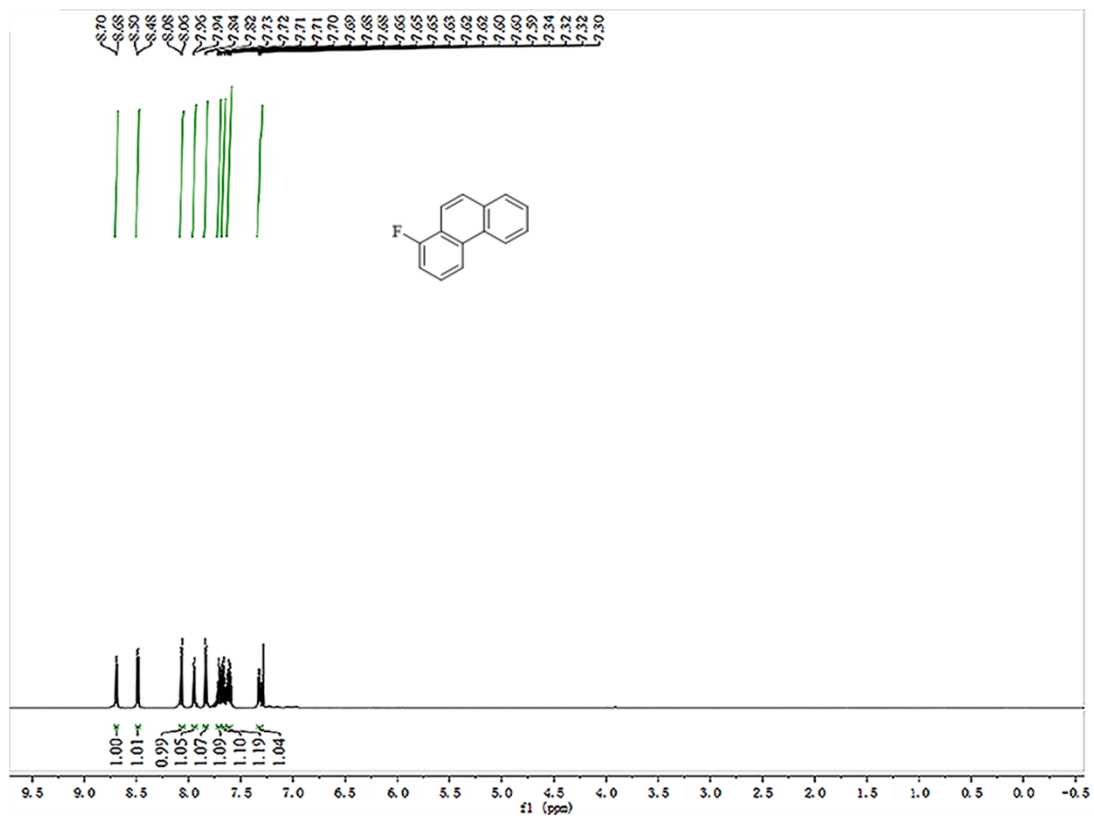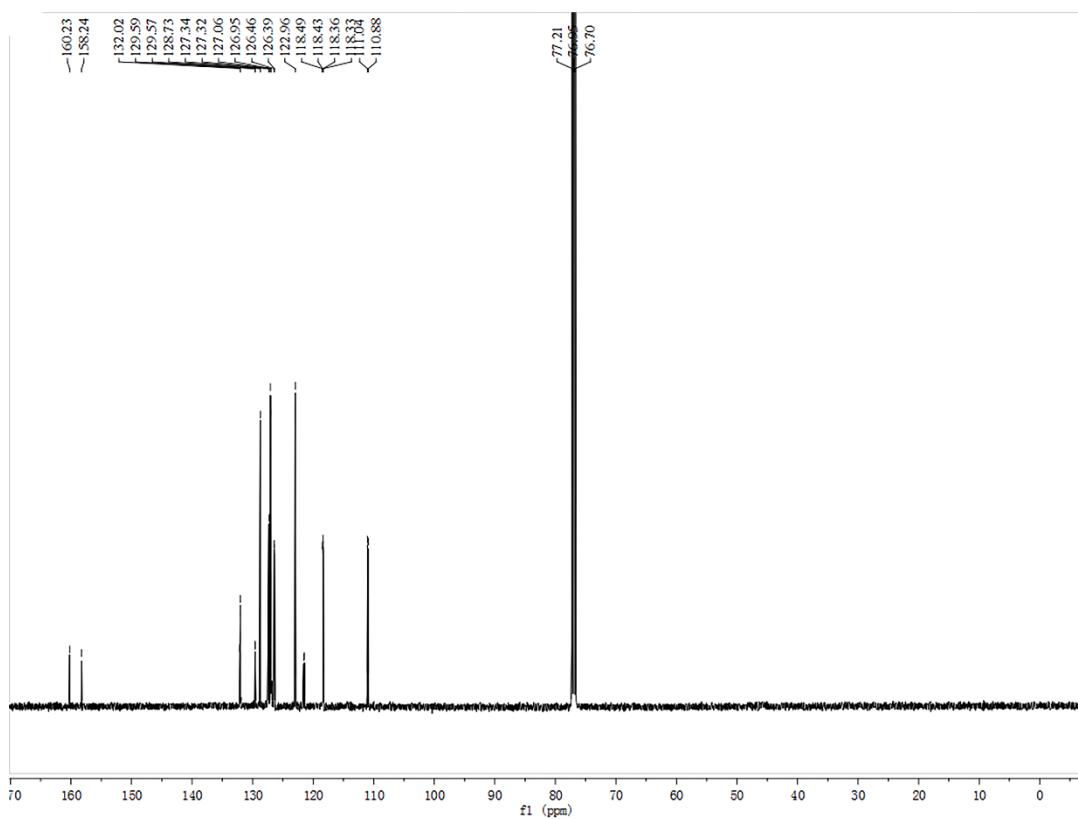

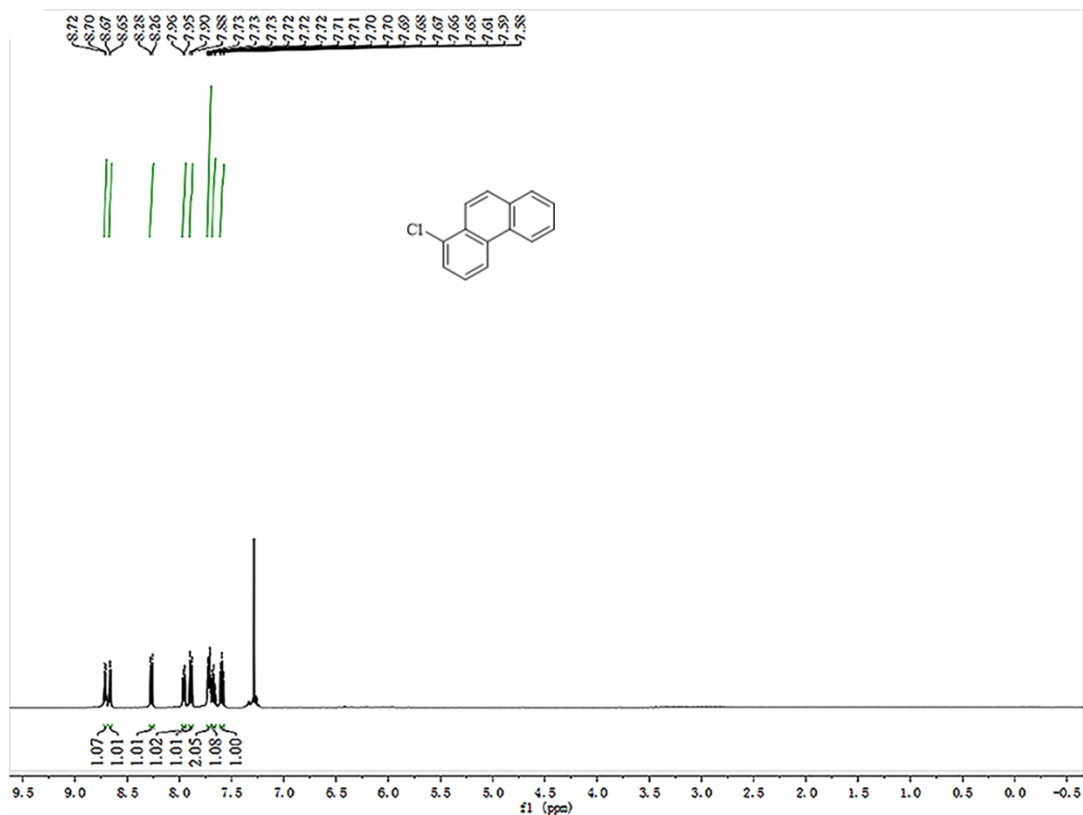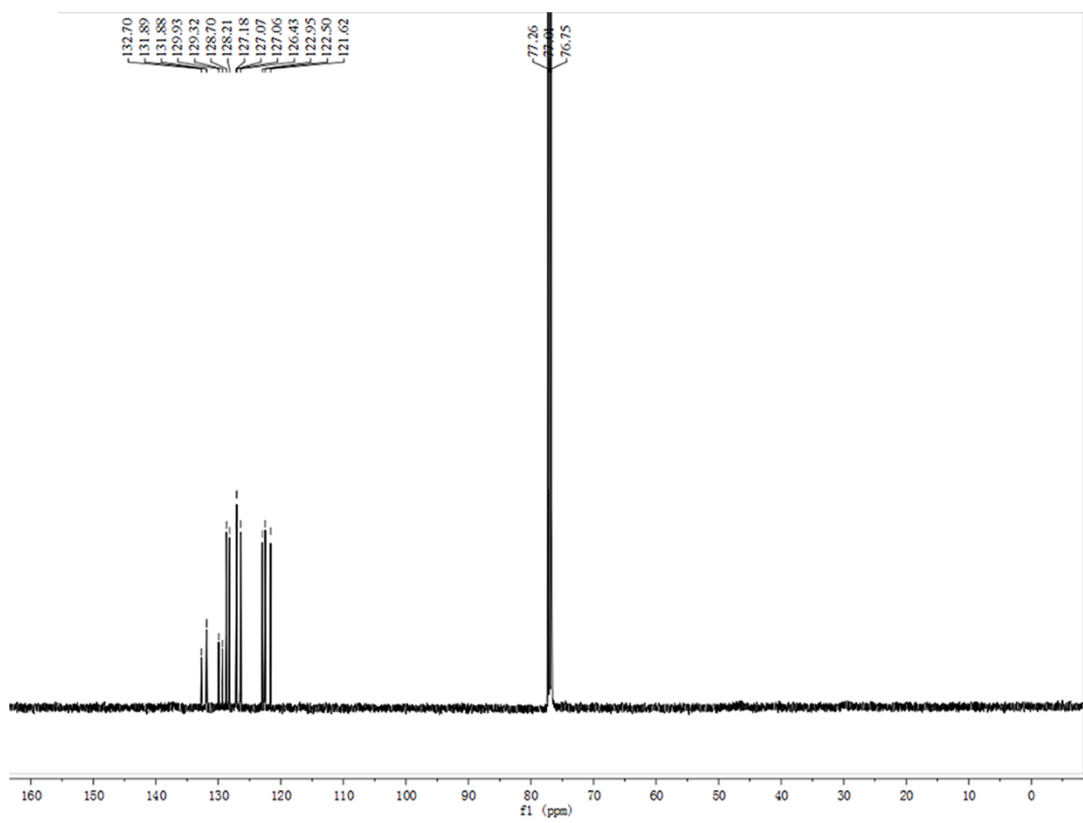

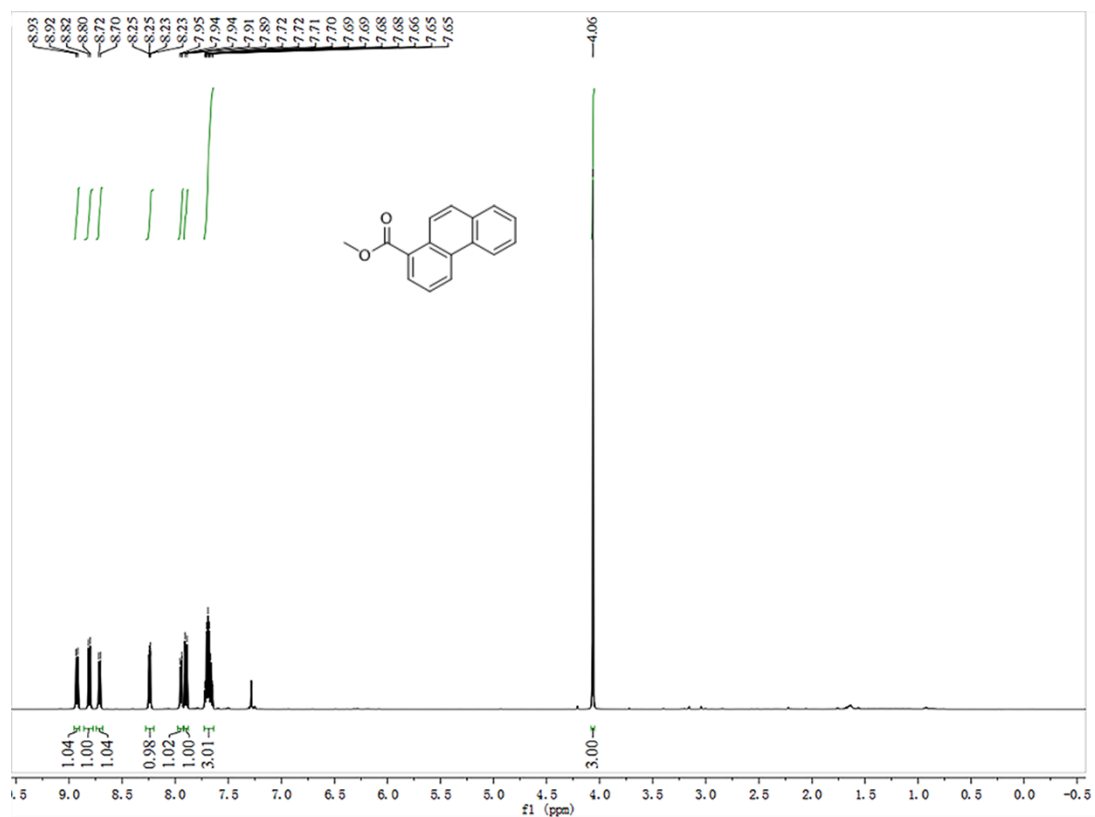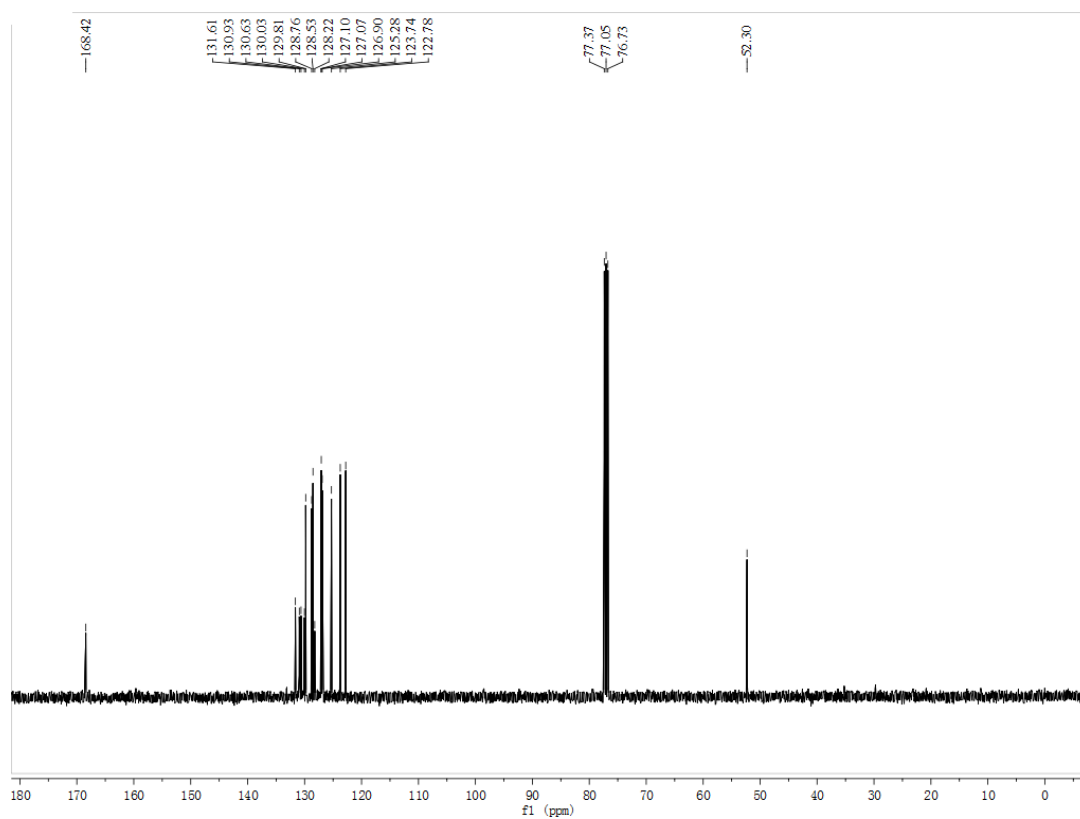

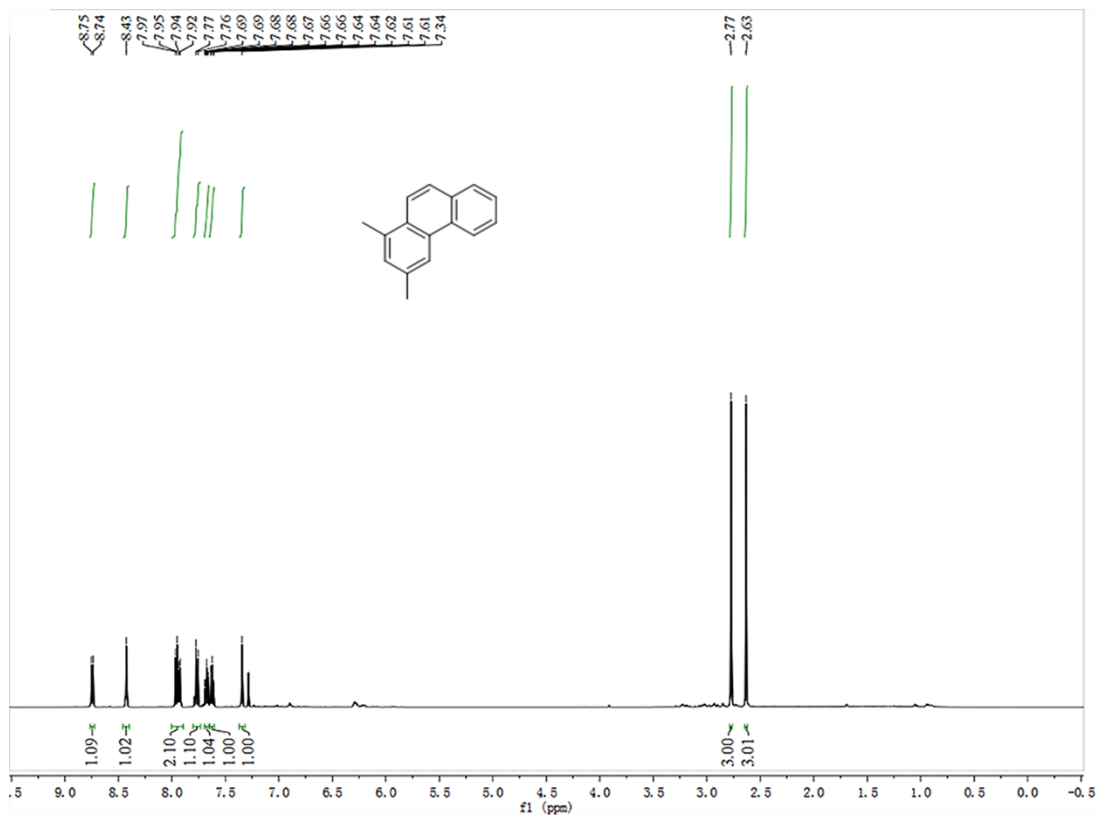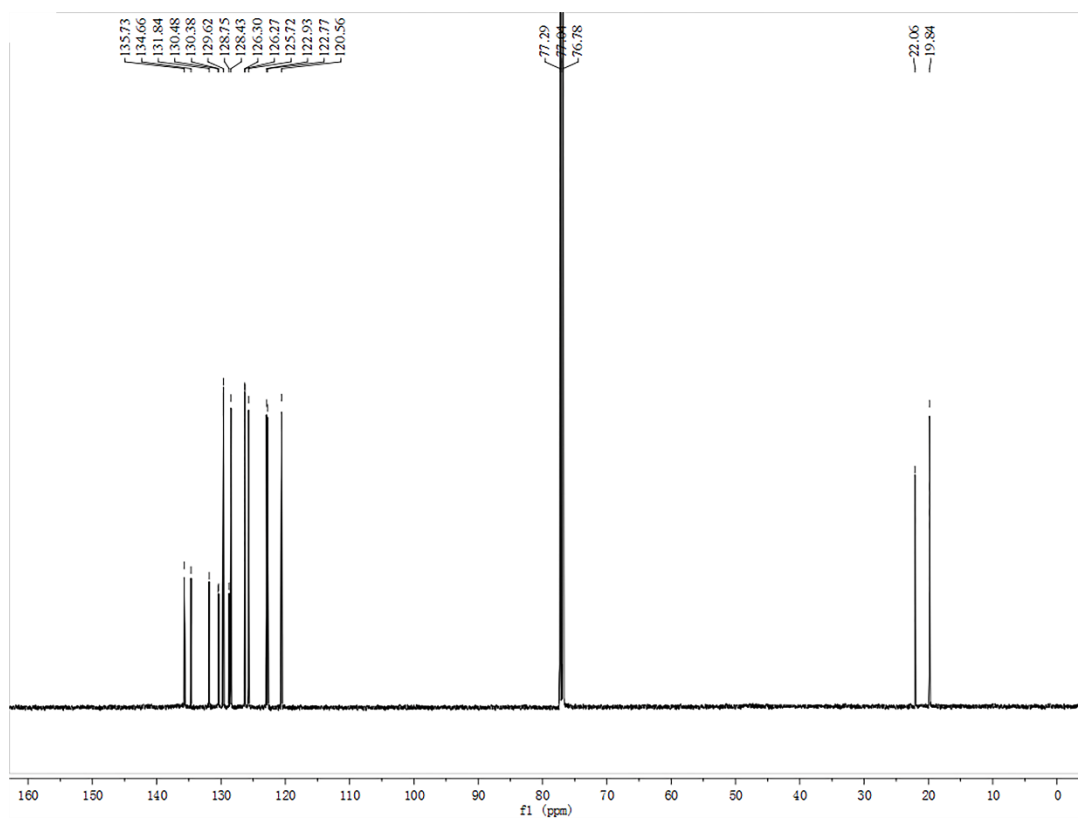

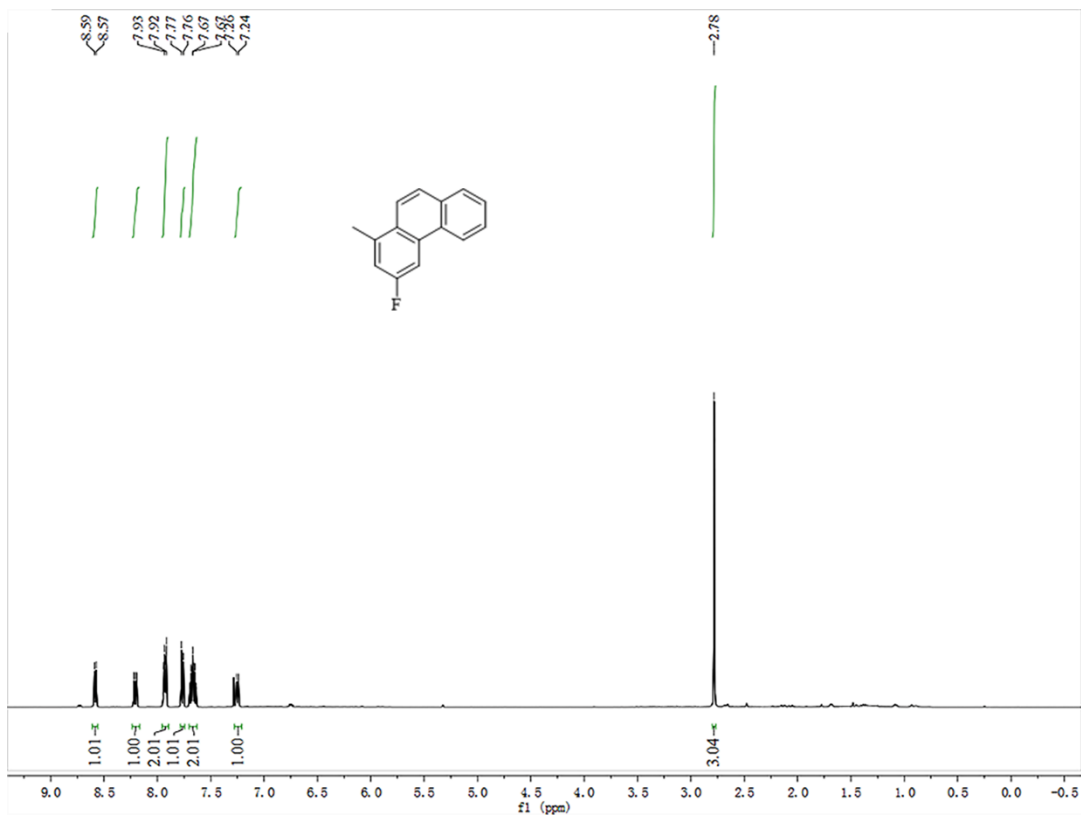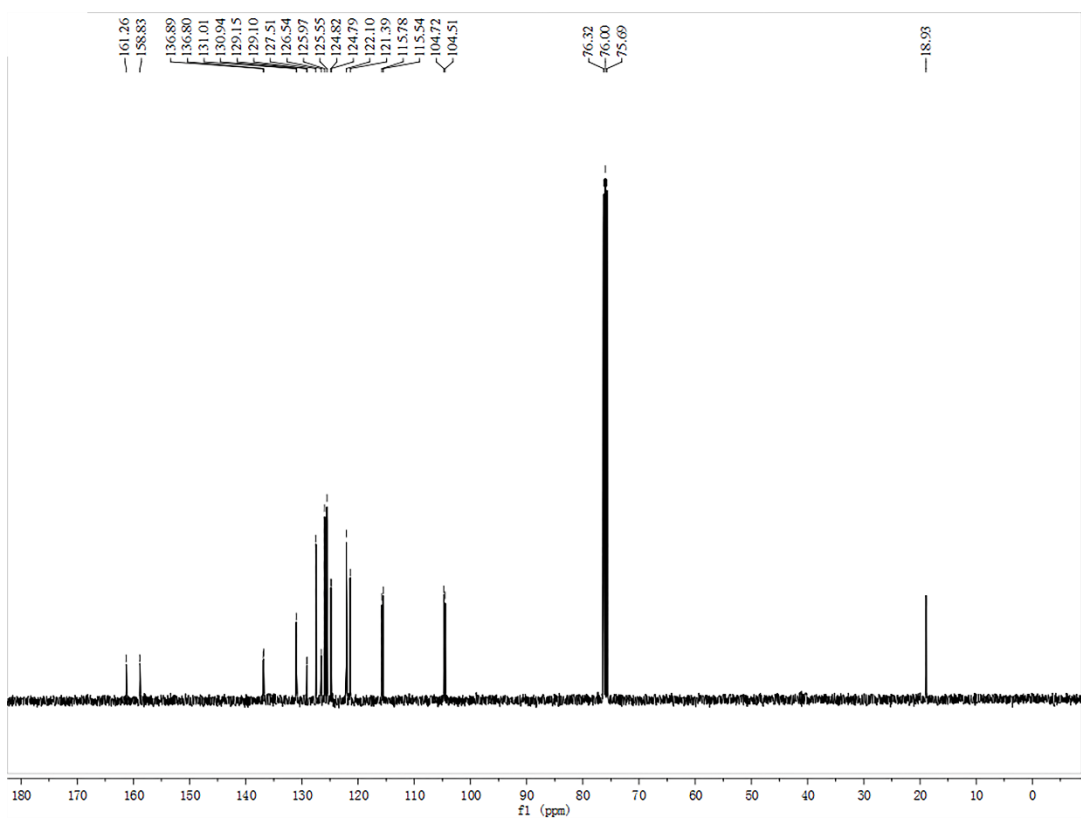

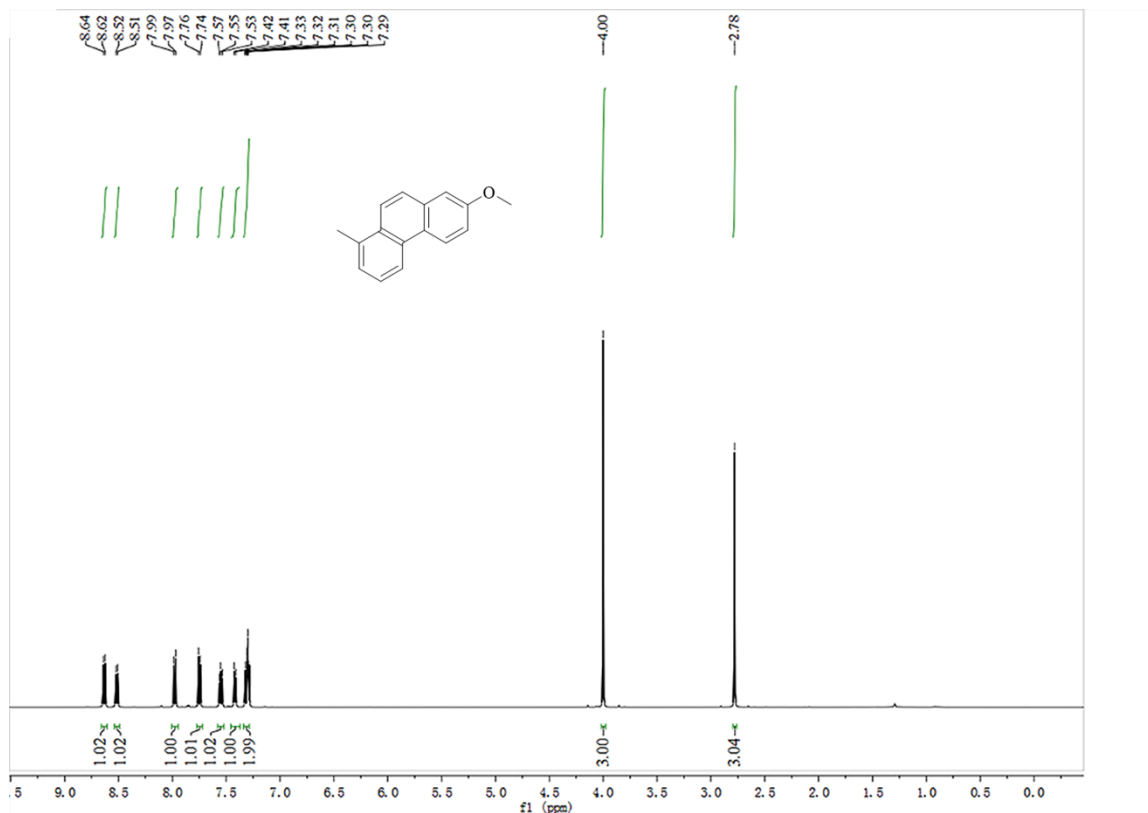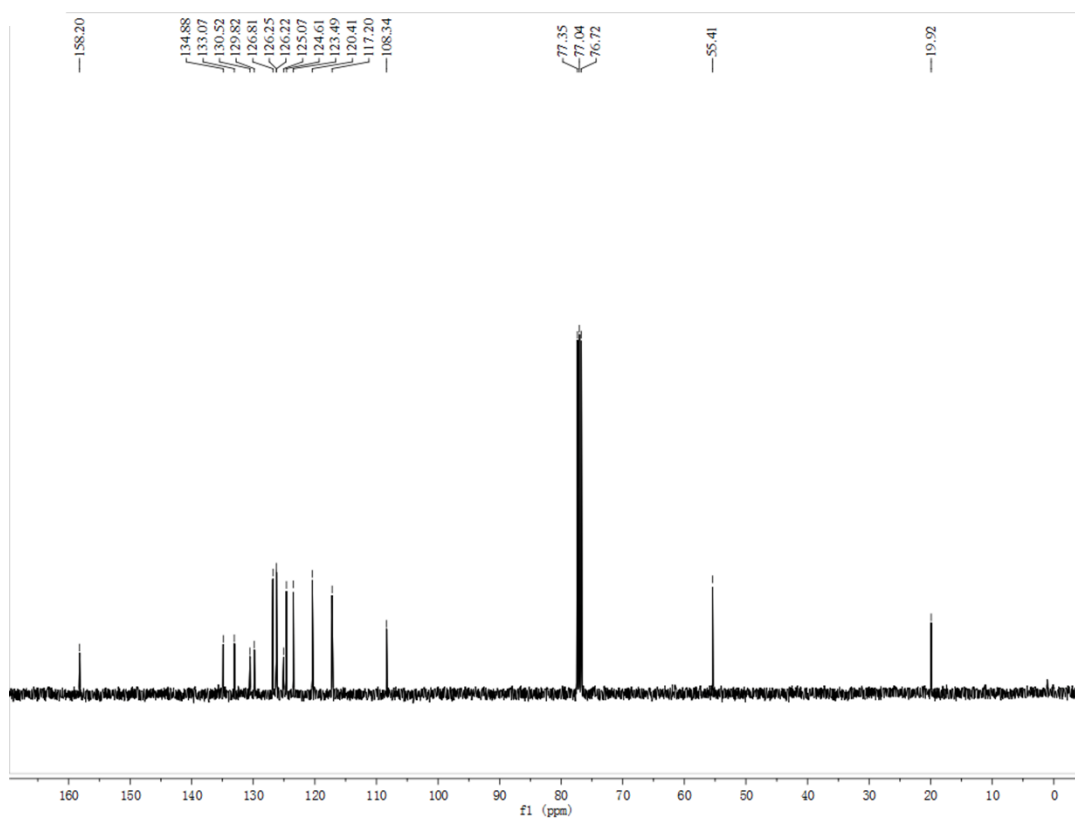



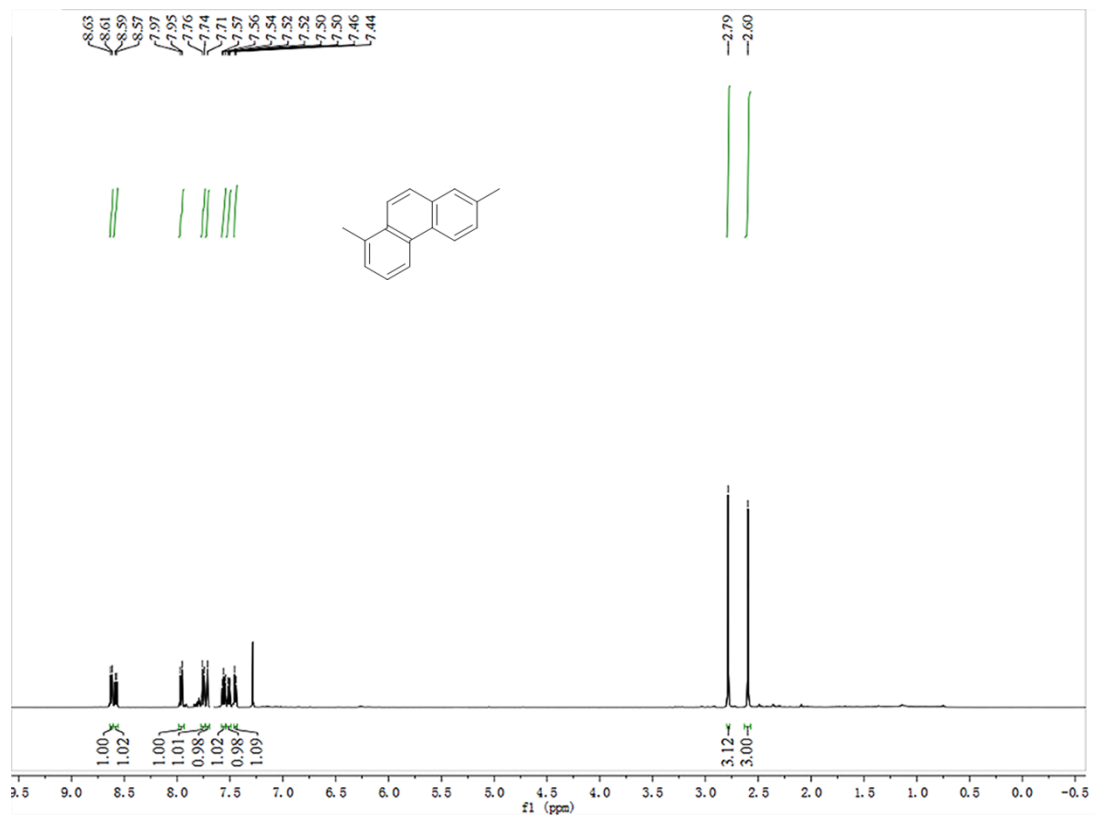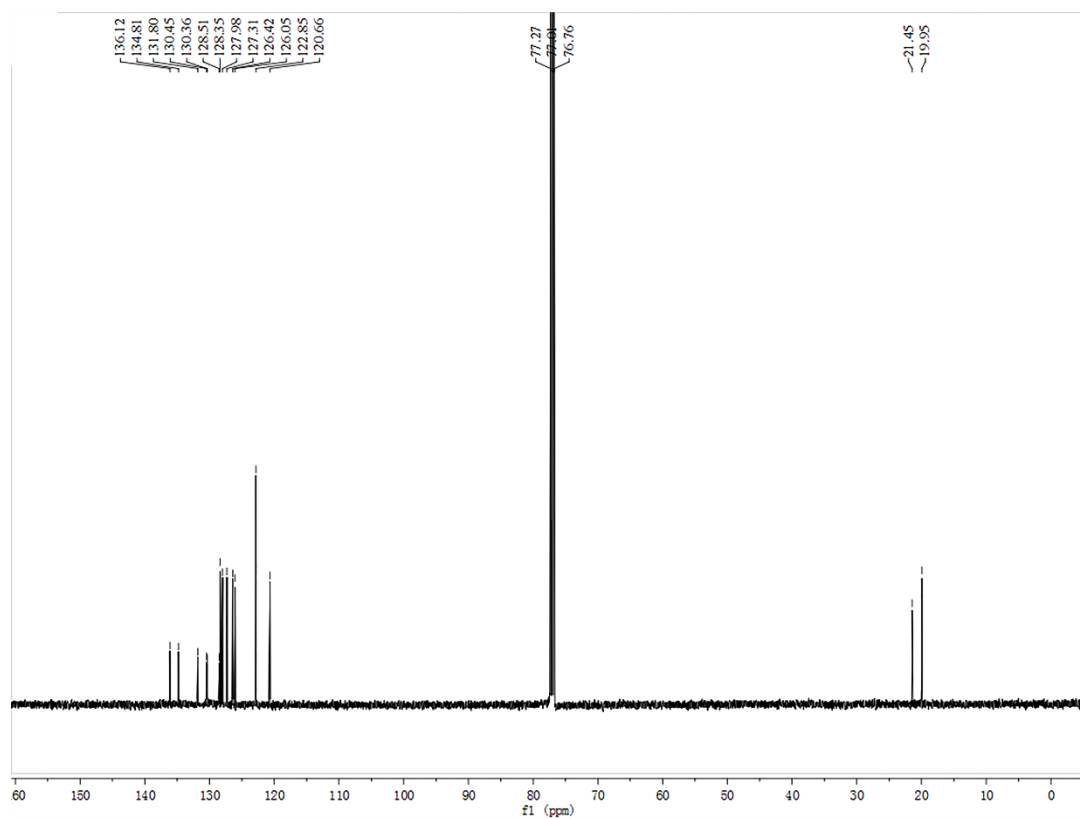

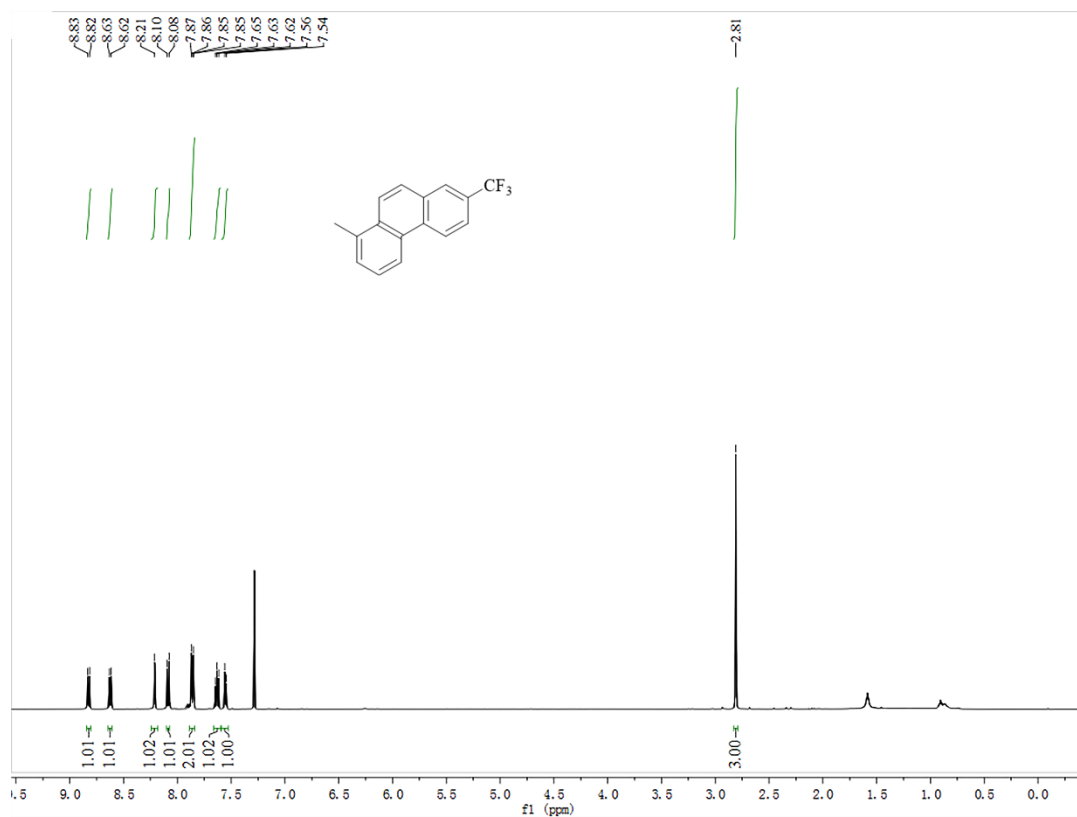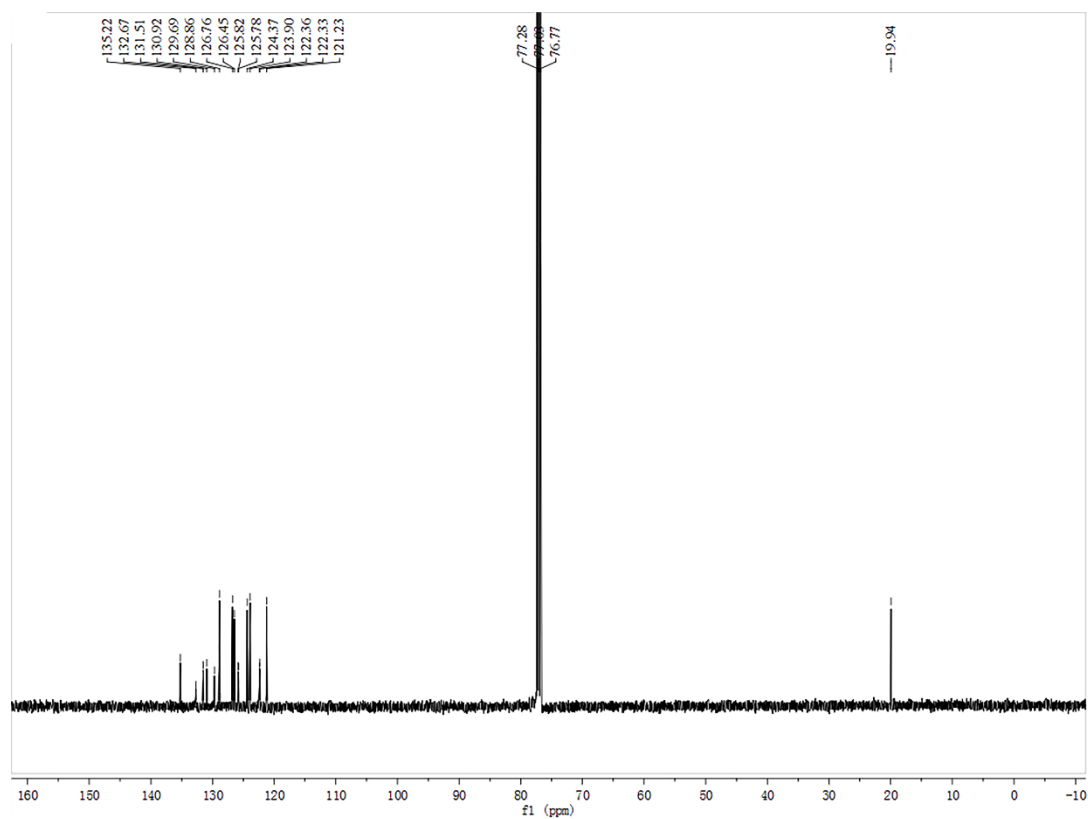

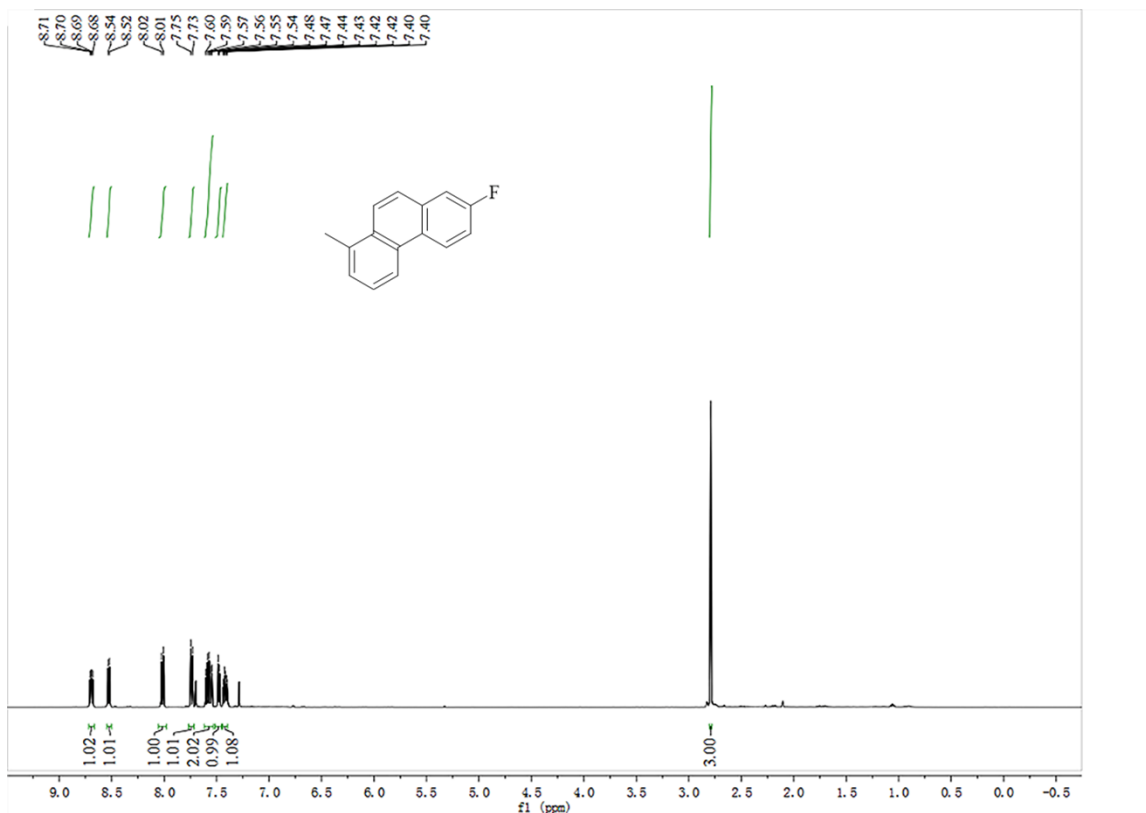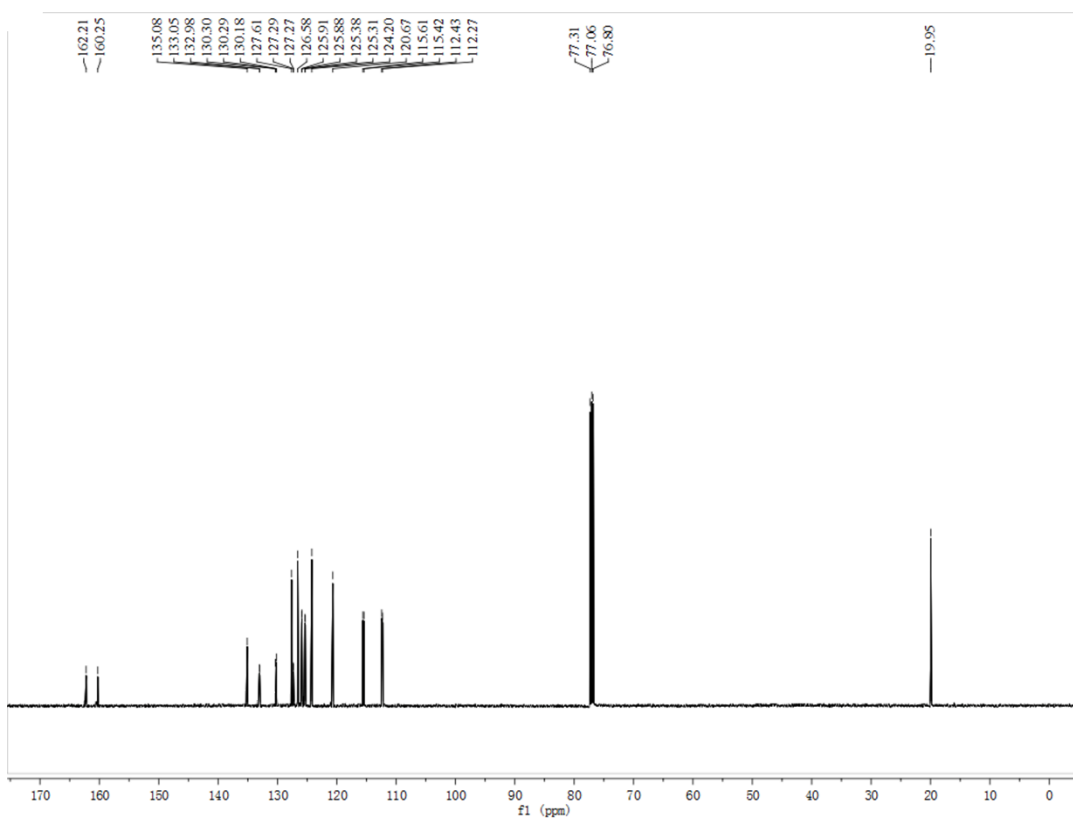

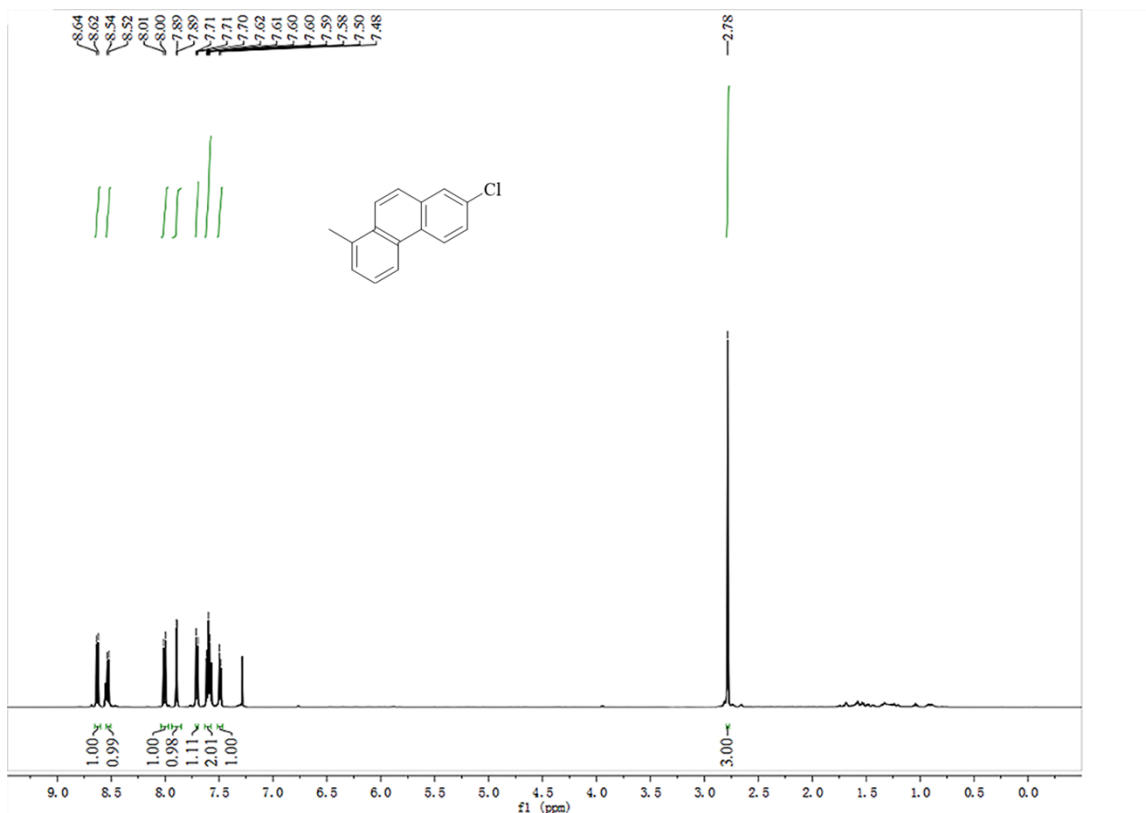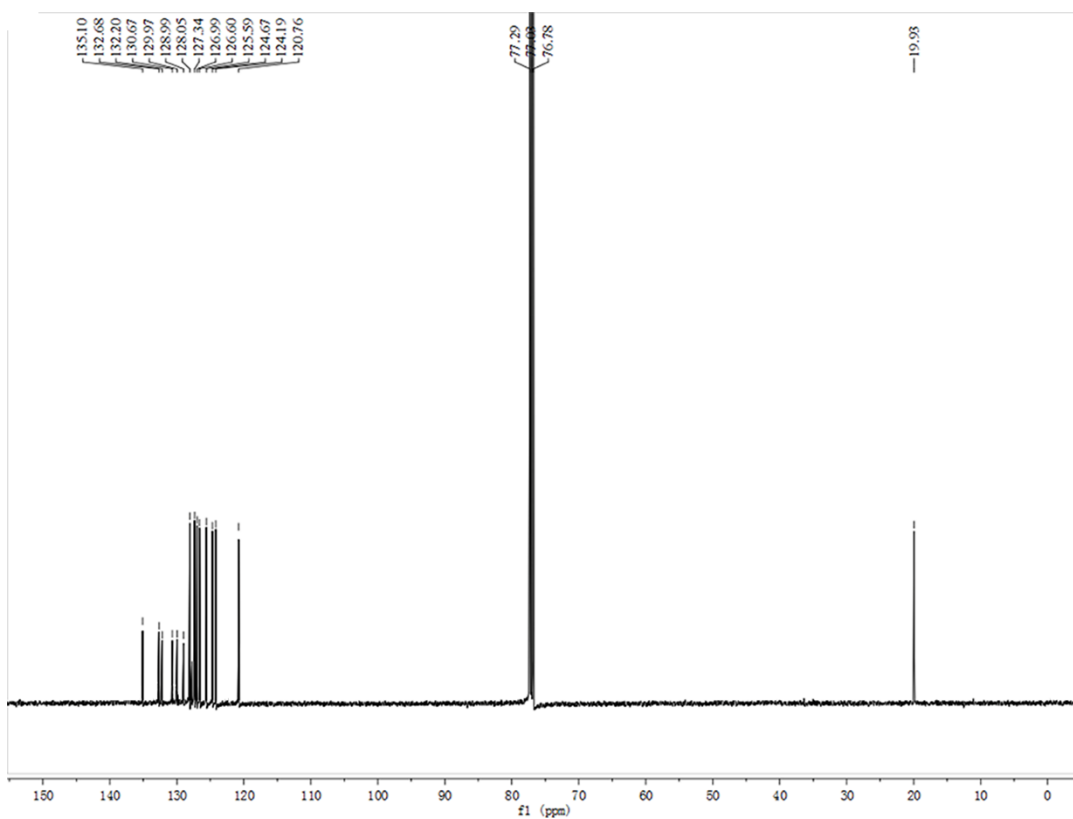

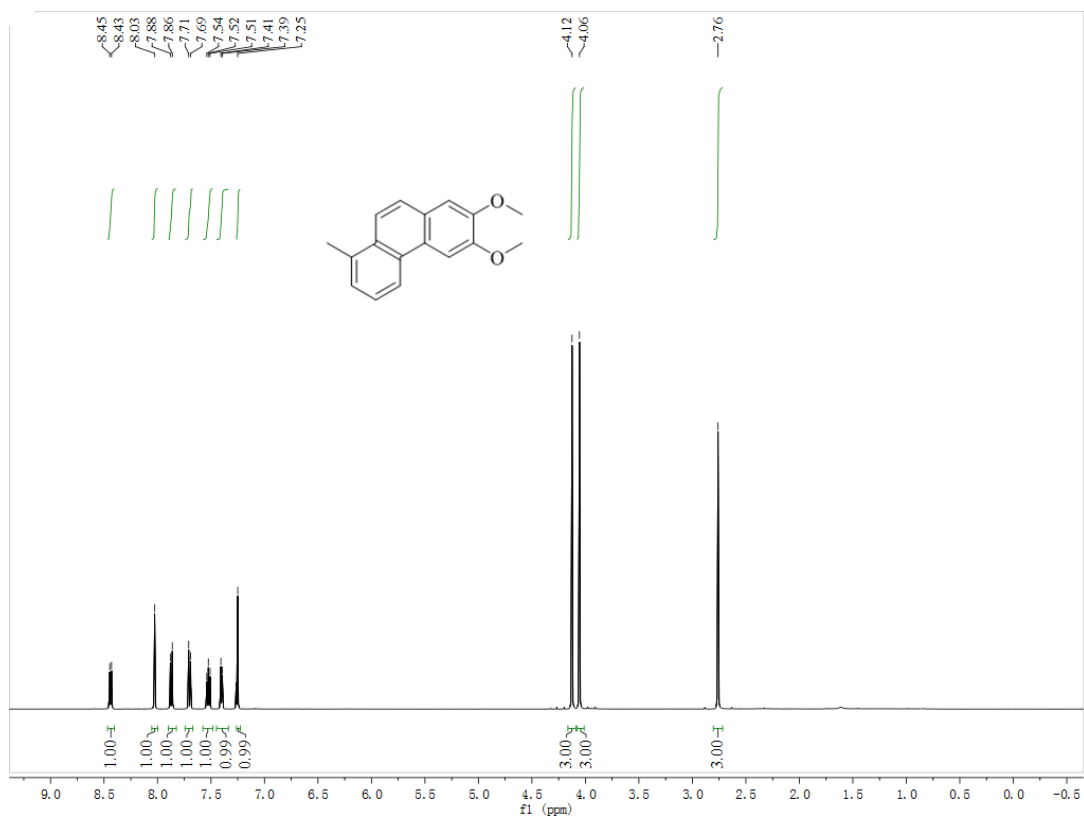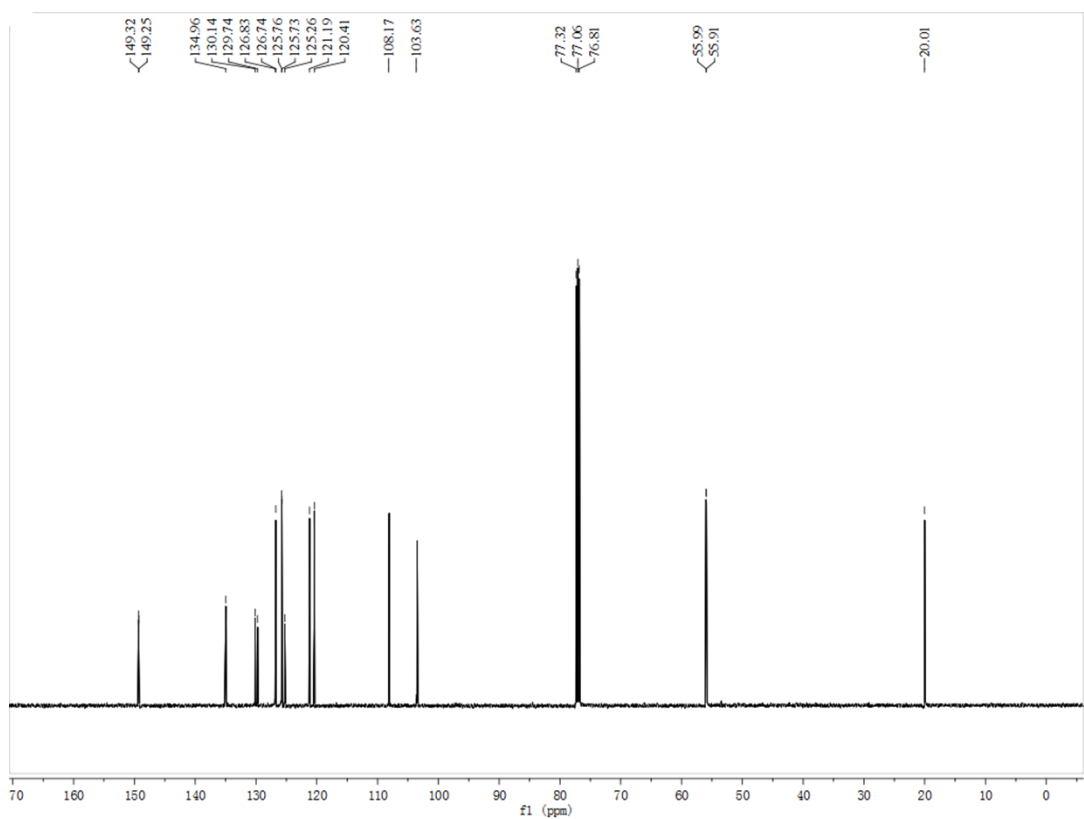

Supplement: Additional file 1 [file 1860-5397-15-26-S1.pdf]
